# Supplementary material for: MiRNAs Expression Profiling in Raw264.7 Macrophages after Nfatc1-Knockdown Elucidates Potential Pathways Involved in Osteoclasts Differentiation
Source: MDPI journal article supplement (doi:10.3390/biology10111080), 2021-10-22
Supplement: s1 [file s1]

**Table S1.** Sequences of the primers used in experiments.

| Primer           | Forward                           | Reverse                                        | use                          |
|------------------|-----------------------------------|------------------------------------------------|------------------------------|
| miR-124-3p       | 5'CACTCGAGGGCATTACCGCGTGCCTTAG-3' | 5'TCGACTAAGGCACGCGGTGAATGCCC<br>TCGAGTGAGCT-3' | cloning in<br>pmirGLO vector |
| Luc2             | 5'-GCAAGATCGCCGTGTAATC-3'         |                                                | colony PCR                   |
| LucR             |                                   | 5'-AGCAGCCAACTCAGCTTCCTTT-3'                   | colony PCR                   |
| miR-124-3p mimic | UAAGGCACGCGGUGAAUGCC              |                                                | transfection                 |

**Figure S1.** NFATc1 mRNA and protein expression in RAW264.7 cells transfected with negative control (NC)- and NFATc1-siRNAs, assessed by qPCR and Western blot respectively.

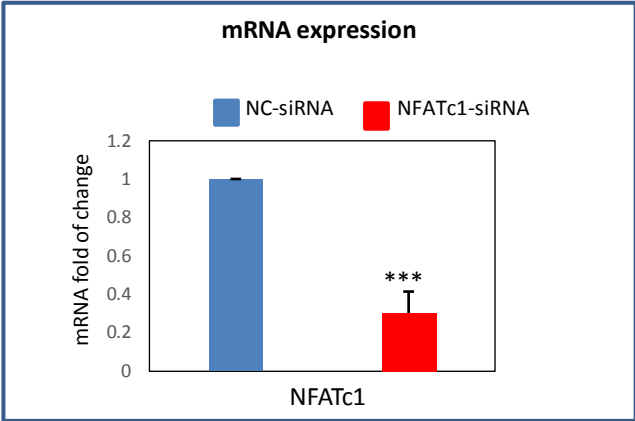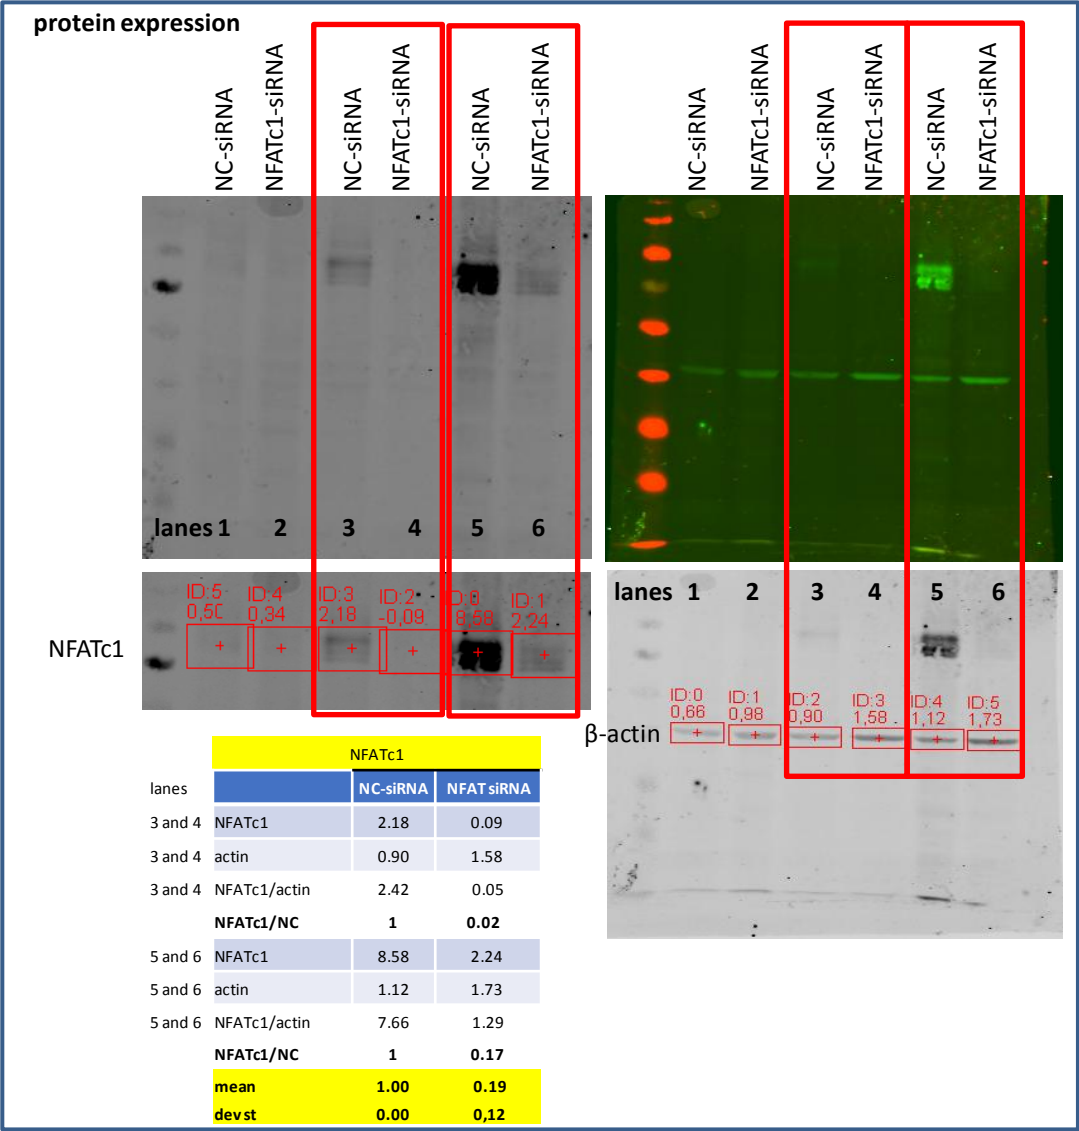

**Table S2A.** KEGG pathway analysis of group 1 miRNAs (10/10)

| KEGG pathway                                            | p-value                  | #genes    | #miRNAs  |
|---------------------------------------------------------|--------------------------|-----------|----------|
| 1. Fatty acid biosynthesis (00061)                      | 5.36140822008e-11        | 3         | 3        |
| 2. Steroid biosynthesis (00100)                         | 1.35867441382e-05        | 8         | 3        |
| 3. Viral carcinogenesis (05204)                         | 1.35867441382e-05        | 60        | 6        |
| 4. Lysine degradation (00310)                           | 7.65597870255e-05        | 18        | 7        |
| <b>5. Regulation of actin cytoskeleton (04810)</b>      | <b>0.000242140581318</b> | <b>64</b> | <b>7</b> |
| 6. Proteoglycans in cancer (05205)                      | 0.000290127806675        | 58        | 9        |
| 7. Thyroid hormone signaling pathway (04919)            | 0.000332301205229        | 37        | 6        |
| 8. Hepatitis B (005161)                                 | 0.000358727205925        | 40        | 7        |
| 9. Progesterone-mediated oocyte maturation (04914)      | 0.000595378670869        | 32        | 8        |
| 10. Bacterial invasion of epithelial cells (05100)      | 0.000917411337915        | 26        | 6        |
| 11. N-Glycan biosynthesis (00510)                       | 0.00108179088565         | 14        | 6        |
| 12. Cell cycle (04510)                                  | 0.00108179088565         | 35        | 6        |
| 13. Axon guidance (04360)                               | 0.00108179088565         | 38        | 6        |
| 14. Glioma (05214)                                      | 0.00108179088565         | 21        | 7        |
| 15. Prostate cancer (05215)                             | 0.00108179088565         | 30        | 7        |
| 16. Neurotrophin signaling pathway (04722)              | 0.00108179088565         | 40        | 8        |
| 17. Renal cell carcinoma (05211)                        | 0.00108179088565         | 26        | 8        |
| 18. FoxO signaling pathway (04068)                      | 0.00246198169547         | 42        | 8        |
| 19. Oocyte meiosis (04114)                              | 0.00434539175804         | 31        | 7        |
| 20. Long-term potentiation (04720)                      | 0.00434539175804         | 24        | 8        |
| 21. Endocytosis (04144)                                 | 0.00503680676890         | 54        | 6        |
| 22. Protein processing in endoplasmic reticulum (04141) | 0.00503680668229         | 51        | 8        |
| 23. Adherens junction (04520)                           | 0.00941611189261         | 23        | 6        |
| 24. Colorectal cancer (05210)                           | 0.00941611189261         | 20        | 6        |
| 25. mTOR signaling pathway (04150)                      | 0.00941611189261         | 22        | 9        |
| 26. Estrogen signaling pathway (04915)                  | 0.0101410087705          | 23        | 6        |
| 27. ErbB signaling pathway (04012)                      | 0.0104964382728          | 29        | 7        |
| 28. Wnt signaling pathway (04310)                       | 0.0115055779276          | 38        | 7        |
| 29. Prolactin signaling pathway (04917)                 | 0.0135073367815          | 22        | 6        |
| <b>30. MAPK signaling pathway (04010)</b>               | <b>0.0135073367815</b>   | <b>63</b> | <b>8</b> |
| 31. HIF-1 signaling pathway (04066)                     | 0.0154468946498          | 33        | 7        |
| 32. Pancreatic cancer (05212)                           | 0.0156921463378          | 21        | 7        |
| 33. Ras signaling pathway (04014)                       | 0.0173657508244          | 50        | 8        |
| 34. Natural killer cell mediated cytotoxicity (04650)   | 0.0173657508244          | 30        | 8        |
| 35. Apoptosis (04210)                                   | 0.0201787525489          | 24        | 7        |
| 36. Chronic myeloid leukemia (05220)                    | 0.021166277299           | 22        | 6        |
| 37. Pathways in cancer (05230)                          | 0.0224201899433          | 91        | 9        |
| <b>38. Focal adhesion (04510)</b>                       | <b>0.0226092919853</b>   | <b>53</b> | <b>7</b> |
| 39. HTLV-I infection (05166)                            | 0.0226092919853          | 68        | 7        |
| <b>40. Osteoclast differentiation (04380)</b>           | <b>0.0254709599574</b>   | <b>36</b> | <b>6</b> |
| 41. Insulin signaling pathway (04910)                   | 0.0363320441651          | 38        | 6        |
| 42. Amyotrophic lateral sclerosis (ALS) (05014)         | 0.0403961787598          | 17        | 6        |
| 43. Hippo signaling pathway (04390)                     | 0.0403961787598          | 33        | 7        |

|                                                   |                 |    |   |
|---------------------------------------------------|-----------------|----|---|
| 44. cGMP-PKG signaling pathway (04022)            | 0.0403961787598 | 44 | 8 |
| 45. Gap junction (04540)                          | 0.0450170270892 | 20 | 6 |
| 46. Phosphatidylinositol signaling system (04070) | 0.0491788387378 | 19 | 5 |

**Table S2B.** KEGG pathway analysis of group 2 miRNAs (28/28)

| KEGG pathway                                                | p-value              | #genes     | #miRNAs   |
|-------------------------------------------------------------|----------------------|------------|-----------|
| 1. Prion diseases (05020)                                   | 6.5227867E-10        | 13         | 10        |
| 2. Proteoglycans in cancer (05205)                          | 6.0461851E-08        | 96         | 24        |
| 3. Endocytosis (04144)                                      | 2.9080974E-07        | 102        | 25        |
| 4. AMPK signaling pathway (04152)                           | 4.3307460E-06        | 66         | 24        |
| <b>5. Regulation of actin cytoskeleton (04810)</b>          | <b>8.6120987E-06</b> | <b>93</b>  | <b>24</b> |
| 6. Adherens junction (04520)                                | 9.2757187E-06        | 39         | 18        |
| 7. Renal cell carcinoma (05211)                             | 3.4566814E-05        | 36         | 20        |
| 8. Phosphatidylinositol signaling system (04070)            | 0.00014385709        | 42         | 17        |
| 9. Pathways in cancer (05200)                               | 0.00016003808        | 153        | 25        |
| <b>10. MAPK signaling pathway (04010)</b>                   | <b>0.00017112352</b> | <b>105</b> | <b>26</b> |
| 11. Cell cycle (04110)                                      | 0.00019967890        | 58         | 19        |
| 12. GnRH signaling pathway (04912)                          | 0.00025417697        | 45         | 22        |
| 13. FoxO signaling pathway (04068)                          | 0.00025417697        | 62         | 24        |
| 14. Thyroid hormone signaling pathway (04919)               | 0.00041221316        | 52         | 21        |
| 15. TGF-beta signaling pathway (004350)                     | 0.00041221316        | 38         | 22        |
| 16. Axon guidance (04360)                                   | 0.00041221316        | 59         | 22        |
| <b>17. Focal adhesion (04510)</b>                           | <b>0.00041221316</b> | <b>89</b>  | <b>24</b> |
| 18. Neutrophin signaling pathway (004722)                   | 0.00041221316        | 57         | 25        |
| 19. Choline metabolism in cancer (005231)                   | 0.00042283937        | 49         | 20        |
| 20. Inositol phosphate metabolism (00562)                   | 0.00086189822        | 28         | 16        |
| 21. Oocyte meiosis (004114)                                 | 0.00086189822        | 50         | 21        |
| 22. Protein processing in endoplasmic reticulum (004141)    | 0.00086189822        | 73         | 23        |
| 23. Bacterial invasion of epithelial cells (005100)         | 0.00150621352        | 34         | 19        |
| 24. Hippo signaling pathway (004390)                        | 0.00150621352        | 64         | 23        |
| 25. Prostate cancer (005215)                                | 0.00151965652        | 42         | 21        |
| 26. Gap junction (004540)                                   | 0.00151965652        | 36         | 23        |
| 27. PI3K-Akt signaling pathway (004151)                     | 0.00116789623        | 133        | 26        |
| 28. Estrogen signaling pathway (004915)                     | 0.00118281127        | 42         | 20        |
| 29. Erb signaling pathway (04012)                           | 0.00182893843        | 39         | 21        |
| 30. mTOR signaling pathway (004150)                         | 0.00256569544        | 31         | 18        |
| 31. Insulin signaling pathway (004910)                      | 0.00431683687        | 61         | 23        |
| 32. Glioma (005214)                                         | 0.00620105012        | 28         | 20        |
| 33. Adrenergic signaling in cardiomyocytes (004261)         | 0.00693163316        | 58         | 24        |
| 34. Hepatitis B (005161)                                    | 0.00839540834        | 55         | 20        |
| 35. Progesterone-mediated oocyte maturation (004914)        | 0.00839540834        | 41         | 21        |
| 36. Oxytocin signaling pathway (04921)                      | 0.00883981551        | 63         | 21        |
| 37. Arrhythmogenic right ventricular cardiomyopathy (05412) | 0.00903399468        | 34         | 21        |
| 38. Ubiquitin mediated proteolysis (004120)                 | 0.01271797451        | 62         | 20        |
| 39. Rap1 signaling pathway (004015)                         | 0.01446270968        | 81         | 24        |
| 40. 2-Oxocarboxylic acid metabolism (001210)                | 0.01472182954        | 8          | 8         |
| 41. Pancreatic cancer (005212)                              | 0.01510748641        | 31         | 20        |
| 42. T cell receptor signaling pathway (004660)              | 0.01510748641        | 44         | 21        |
| 43. Colorectal cancer (005210)                              | 0.01542217975        | 29         | 21        |

|                                                     |                      |           |           |
|-----------------------------------------------------|----------------------|-----------|-----------|
| 44. Fc gamma R-mediated phagocytosis (004666)       | 0.01616154248        | 32        | 20        |
| 45. Prolactin signaling pathway (004917)            | 0.01616421548        | 32        | 20        |
| 46. Salmonella infection (005132)                   | 0.01661874263        | 34        | 18        |
| 47. Ras signaling pathway (004014)                  | 0.01676152728        | 81        | 25        |
| 48. Central carbon metabolism in cancer (005230)    | 0.01898506346        | 27        | 18        |
| 49. Dilated cardiomyopathy (005414)                 | 0.01949299154        | 38        | 23        |
| 50. Hypertrophic cardiomyopathy (005410)            | 0.02188546371        | 36        | 22        |
| 51. Transcriptional misregulation in cancer (05202) | 0.02279832206        | 65        | 23        |
| 52. Citrate cycle (000020)                          | 0.02353014972        | 15        | 11        |
| 53. HIF-1 alpha pathway signaling (004066)          | 0.02397002727        | 47        | 18        |
| 54. Dorso-ventral axis formation (04320)            | 0.02461794116        | 14        | 18        |
| 55. Lysine degradation (00310)                      | 0.03080776531        | 20        | 13        |
| 56. HTLV-1 infection (05166)                        | 0.03243437970        | 99        | 24        |
| 57. Amphetamine addiction (05031)                   | 0.03270849842        | 27        | 17        |
| <b>58. Osteoclast differentiation (04380)</b>       | <b>0.03431825384</b> | <b>50</b> | <b>23</b> |
| 59. Acute myeloid leukemia (05221)                  | 0.03565183747        | 24        | 18        |
| 60. TNF signaling pathway (04668)                   | 0.03565183747        | 45        | 22        |
| 61. Gastric acid secretion (04971)                  | 0.03593114406        | 31        | 16        |
| 62. One carbon pool by folate (00670)               | 0.04061838855        | 7         | 6         |
| 63. Chagas disease (05142)                          | 0.04061833885        | 39        | 20        |
| 64. cAMP signaling pathway (004024)                 | 0.04061838855        | 75        | 23        |
| 65. Steroid biosynthesis (00100)                    | 0.04301718373        | 7         | 8         |
| 66. Long term depression (04730)                    | 0.04301718373        | 26        | 20        |

**Table S2C.** KEGG pathway analysis of group 3 miRNAs (6/6)

| KEGG pathway                                                     | p-value                  | #genes    | #miRNAs  |
|------------------------------------------------------------------|--------------------------|-----------|----------|
| <b>1. ECM-receptor interaction (04512)</b>                       | <b>2.38994017785e-25</b> | <b>4</b>  | <b>4</b> |
| 2. Fatty acid biosynthesis (00061)                               | 1.52631231255e-16        | 4         | 3        |
| 3. Lysine degradation (00310)                                    | 1.61410951993e-10        | 16        | 3        |
| 4. Proteoglycans in cancer (05205)                               | 1.75254998173e-09        | 51        | 6        |
| 5. Fatty acid metabolism (01212)                                 | 2.17918089738e-07        | 10        | 3        |
| 6. Glioma (005214)                                               | 7.68794571091e-06        | 20        | 6        |
| 7. Oocyte meiosis (04114)                                        | 1.19151760973e-05,       | 30        | 6        |
| 8. Renal cell carcinoma (05211)                                  | 2.28545930945e-05        | 22        | 6        |
| <b>9. Focal adhesion (04510)</b>                                 | <b>2.43074477409e-05</b> | <b>53</b> | <b>6</b> |
| 10. Endocytosis (04144)                                          | 3.9260989193e-05         | 49        | 6        |
| 11. FoxO signaling pathway (04068)                               | 0.000127041152984        | 35        | 6        |
| 11. Gap junction (04540)                                         | 0.000397609828077        | 20        | 4        |
| 12. ErbB signaling pathway (04012)                               | 0.000451639669319        | 20        | 4        |
| 13. Transcriptional misregulation in cancer (05202)              | 0.00060441507812         | 37        | 6        |
| 14. Progesterone-mediated oocyte maturation (04914)              | 0.0011148974601          | 26        | 6        |
| 15. Prostate cancer (05215)                                      | 0.00127908177104         | 24        | 6        |
| 16. mTOR signaling pathway (04150)                               | 0.00135794845682         | 20        | 6        |
| 17. Pathways in cancer (05200)                                   | 0.00137081025218         | 77        | 6        |
| 18. Neurotrophin signaling pathway (04722)                       | 0.00157519357955         | 32        | 5        |
| 19. AMPK signaling pathway (04152)                               | 0.0020370687641          | 29        | 6        |
| 20. PI3K-Akt signaling pathway (04151)                           | 0.00298596894611         | 69        | 6        |
| 21. Glycosaminoglycan bios.- chond. sulf./ derm. sulf. (00532)   | 0.00320667175771         | 4         | 2        |
| 22. Glycosaminoglycan biosynthesis - hep. sulf./ heparin (00534) | 0.0037262272458          | 5         | 3        |
| 23. GnRH signaling pathway (04912)                               | 0.00413394872213         | 23        | 4        |
| 24. Ras signaling pathway (04014)                                | 0.00460747043151         | 43        | 6        |
| 25. Steroid biosynthesis (00100)                                 | 0.00503370968364         | 5         | 1        |
| 26. Estrogen signaling pathway (04915)                           | 0.00890741453019         | 22        | 5        |
| <b>27. MAPK signaling pathway (04010)</b>                        | <b>0.0136134307112</b>   | <b>50</b> | <b>6</b> |
| 28. Rap1 signaling pathway (04015)                               | 0.0150538560358          | 41        | 6        |
| 29. Long-term potentiation (04720)                               | 0.0155601847529          | 18        | 6        |
| 30. Cell cycle (04110)                                           | 0.0165132896613          | 26        | 4        |
| 31. Non-small cell lung cancer (05223)                           | 0.0247040002813          | 16        | 5        |
| 32. Long-term depression (04730)                                 | 0.0373838758498          | 13        | 3        |
| 33. Insulin signaling pathway (04910)                            | 0.0391747801457          | 30        | 5        |
| 34. Arrhythmogenic right ventricular cardiomyopathy (05412)      | 0.0409341523648          | 11        | 4        |
| 35. Colorectal cancer (05210)                                    | 0.0481305403395          | 14        | 5        |

**Table S2D.** KEGG pathway analysis of group 4 miRNAs (4/4).

| KEGG pathway                                           | p-value                  | #genes    | #miRNAs  |
|--------------------------------------------------------|--------------------------|-----------|----------|
| 1.Prion diseases (05020)                               | 3.87745724717e-15        | 8         | 3        |
| 2. Fatty acid metabolism (01212)                       | 2.25175998536e-12        | 13        | 3        |
| 3. Fatty acid biosynthesis (00061)                     | 6.55652671864e-11        | 2         | 2        |
| 4. Adherens junction (04520)                           | 2.94982666607e-07        | 30        | 3        |
| <b>5. MAPK signaling pathway (04010)</b>               | <b>2.61806457963e-05</b> | <b>70</b> | <b>4</b> |
| 6. Vitamin B6 metabolism (00750)                       | 4.49524337343e-05        | 4         | 3        |
| 7. Axon guidance (04360)                               | 4.49524337343e-05        | 40        | 4        |
| 8. Thyroid hormone signaling pathway (04919)           | 5.87952248746e-05        | 39        | 4        |
| 9. Renal cell carcinoma (05211)                        | 0.000119371873751        | 24        | 4        |
| 10. Lysine degradation (00310)                         | 0.000124527226046        | 15        | 4        |
| 11. Glioma (05214)                                     | 0.000146269820369        | 22        | 4        |
| 12. FoxO signaling pathway (04068)                     | 0.000183091510842        | 45        | 4        |
| 13.Protein processing in endoplasmic reticulum (04141) | 0.000318724486747        | 51        | 4        |
| 14. AMPK signaling pathway (04152)                     | 0.000573944102313        | 40        | 4        |
| 15. HIF-1 signaling pathway (04066)                    | 0.000844222165995        | 38        | 4        |
| 16. Endocytosis (04144)                                | 0.000876790528935        | 61        | 4        |
| 17. Hepatitis B (05161)                                | 0.00149977377214         | 38        | 4        |
| 18. Proteoglycans in cancer (05205)                    | 0.0019216759989          | 55        | 4        |
| <b>19. Regulation of actin cytoskeleton (04810)</b>    | <b>0.00417318618615</b>  | <b>57</b> | <b>4</b> |
| 20. Bacterial invasion of epithelial cells (05100)     | 0.00417318618615         | 25        | 4        |
| 21. HTLV-I infection (05166)                           | 0.00496583962993         | 66        | 4        |
| 22. Biosynthesis of unsaturated fatty acids (01040)    | 0.00506036157971         | 7         | 3        |
| 23. Prostate cancer (05215)                            | 0.00718943592066         | 29        | 4        |
| 24. ErbB signaling pathway (04012)                     | 0.00758701108779         | 29        | 4        |
| 25. Insulin signaling pathway (04910)                  | 0.0108287823726          | 40        | 4        |
| 26. Ras signaling pathway (04014)                      | 0.0116576072014          | 51        | 4        |
| 27. mTOR signaling pathway (04150)                     | 0.0151345309413          | 20        | 4        |
| 28. Chronic myeloid leukemia (05220)                   | 0.01888700259923         | 22        | 4        |
| 29. T cell receptor signaling pathway (04660)          | 0.02096215405013         | 30        | 4        |
| 30. Neurotrophin signaling pathway (04722)             | 0.0218052848915          | 34        | 4        |
| 31. Pancreatic cancer (05212)                          | 0.0247015424952          | 22        | 4        |
| <b>32. Focal adhesion (04510)</b>                      | <b>0.0265055523393</b>   | <b>52</b> | <b>4</b> |
| 33. Synaptic vesicle cycle (04721)                     | 0.0270896343279          | 17        | 3        |
| 34. Viral carcinogenesis (05203)                       | 0.027200161878           | 48        | 4        |
| 35. Galactose metabolism (00052)                       | 0.032424353118           | 7         | 3        |
| 36. Pathways in cancer (05200)                         | 0.0392699197559          | 86        | 4        |

**S1A.** Group 1 miRNAs involved in selected pathways, showing the number of predicted target genes for each of them, as identified by Tarbase v.8 or MicroT-CDS v.5.0 databases.

| 7/10 miRNAs involved in Regulation of actin cytoskeleton (mmu04810) |                           | Genes | 8/10 miRNAs involved in MAPK signaling pathway (mmu04010)     |                           | Genes |
|---------------------------------------------------------------------|---------------------------|-------|---------------------------------------------------------------|---------------------------|-------|
| 1.                                                                  | mmu-miR-30c-5p Tarbase    | 28    | 1.                                                            | mmu-miR-218-5p Tarbase    | 23    |
| 2.                                                                  | mmu-miR-218-5p Tarbase    | 24    | 2.                                                            | mmu-miR-214-3p Tarbase    | 6     |
| 3.                                                                  | mmu-miR-214-3p Tarbase    | 9     | 3.                                                            | mmu-miR-467c-5p Tarbase   | 7     |
| 4.                                                                  | mmu-miR-467c-5p Tarbase   | 8     | 4.                                                            | mmu-miR-30c-5p Tarbase    | 33    |
| 5.                                                                  | mmu-miR-29b-3p Tarbase    | 15    | 5.                                                            | mmu-miR-29b-3p Tarbase    | 10    |
| 6.                                                                  | mmu-miR-541-5p microT-CDS | 2     | 6.                                                            | mmu-miR-488-3p microT-CDS | 7     |
| 7.                                                                  | mmu-miR-488-3p microT-CDS | 3     | 7.                                                            | mmu-miR-411-5p microT-CDS | 3     |
|                                                                     |                           |       | 8.                                                            | mmu-miR-541-5p microT-CDS | 1     |
|                                                                     |                           |       |                                                               |                           |       |
| 7/10 miRNAs involved in Focal adhesion (mmu04510)                   |                           | Genes | 6/10 miRNAs involved in Osteoclast differentiation (mmu04380) |                           | Genes |
| 1.                                                                  | mmu-miR-29b-3p Tarbase    | 14    | 1.                                                            | mmu-miR-30c-5p Tarbase    | 20    |
| 2.                                                                  | mmu-miR-30c-5p Tarbase    | 21    | 2.                                                            | mmu-miR-218-5p Tarbase    | 11    |
| 3.                                                                  | mmu-miR-218-5p Tarbase    | 18    | 3.                                                            | mmu-miR-29b-3p Tarbase    | 6     |
| 4.                                                                  | mmu-miR-488-3p microT-CDS | 4     | 4.                                                            | mmu-miR-488-3p microT-CDS | 4     |
| 5.                                                                  | mmu-miR-467c-5p Tarbase   | 6     | 5.                                                            | mmu-miR-214-3p Tarbase    | 7     |
| 6.                                                                  | mmu-miR-214-3p Tarbase    | 8     | 6.                                                            | mmu-miR-467c-5p Tarbase   | 7     |
| 7.                                                                  | mmu-miR-541-5p microT-CDS | 1     |                                                               |                           |       |

**S1B.** Group 2 miRNAs involved in selected pathways, showing the number of predicted target genes for each of them, as identified by Tarbase v.8 or MicroT-CDS v.5.0 databases.

| 26/28 miRNA involved in MAPK signaling (mmu04010)              |                            | Genes | 24/28 miRNA involved in Focal adhesion (mmu04510)                   |                            | Genes |
|----------------------------------------------------------------|----------------------------|-------|---------------------------------------------------------------------|----------------------------|-------|
| 1.                                                             | mmu-miR-19b-3p Tarbase     | 32    | 1.                                                                  | mmu-miR-182-5p microT-CDS  | 10    |
| 2.                                                             | mmu-miR-96-5p microT-CDS   | 19    | 2.                                                                  | mmu-miR-295-3p microT-CDS  | 7     |
| 3.                                                             | mmu-miR-15b-5p microT-CDS  | 7     | 3.                                                                  | mmu-miR-19b-3p Tarbase     | 32    |
| 4.                                                             | mmu-miR-144-3p microT-CDS  | 12    | 4.                                                                  | mmu-miR-10a-5p microT-CDS  | 2     |
| 5.                                                             | mmu-miR-182-5p microT-CDS  | 13    | 5.                                                                  | mmu-miR-96-5p microT-CDS   | 12    |
| 6.                                                             | mmu-miR-32-5p microT-CDS   | 10    | 6.                                                                  | mmu-miR-15b-5p microT-CDS  | 10    |
| 7.                                                             | mmu-miR-9-5p microT-CDS    | 24    | 7.                                                                  | mmu-miR-126a-3p TargetScan | 1     |
| 8.                                                             | mmu-miR-21a-5p microT-CDS  | 8     | 8.                                                                  | mmu-miR-32-5p microT-CDS   | 16    |
| 9.                                                             | mmu-miR-29a-3p Tarbase     | 10    | 9.                                                                  | mmu-miR-29a-3p Tarbase     | 14    |
| 10.                                                            | mmu-miR-23b-3p Tarbase     | 21    | 10.                                                                 | mmu-miR-23b-3p Tarbase     | 13    |
| 11.                                                            | mmu-miR-10a-5p microT-CDS  | 3     | 11.                                                                 | mmu-miR-880-3p microT-CDS  | 2     |
| 12.                                                            | mmu-miR-295-3p microT-CDS  | 14    | 12.                                                                 | mmu-miR-9-5p microT-CDS    | 15    |
| 13.                                                            | mmu-miR-22-5p microT-CDS   | 7     | 13.                                                                 | mmu-miR-425-5p microT-CDS  | 3     |
| 14.                                                            | mmu-miR-196b-5p microT-CDS | 5     | 14.                                                                 | mmu-miR-22-5p microT-CDS   | 5     |
| 15.                                                            | mmu-miR-196a-5p microT-CDS | 5     | 15.                                                                 | mmu-miR-21a-5p microT-CDS  | 4     |
| 16.                                                            | mmu-miR-183-5p TargetScan  | 2     | 16.                                                                 | mmu-miR-142a-3p microT-CDS | 6     |
| 17.                                                            | mmu-miR-142a-3p microT-CDS | 5     | 17.                                                                 | mmu-miR-146a-5p Tarbase    | 6     |
| 18.                                                            | mmu-miR-146a-5p Tarbase    | 6     | 18.                                                                 | mmu-miR-144-3p microT-CDS  | 8     |
| 19.                                                            | mmu-miR-425-5p microT-CDS  | 1     | 19.                                                                 | mmu-miR-196b-5p microT-CDS | 6     |
| 20.                                                            | mmu-miR-31-5p TargetScan   | 2     | 20.                                                                 | mmu-miR-196a-5p microT-CDS | 7     |
| 21.                                                            | mmu-miR-140-5p Tarbase     | 3     | 21.                                                                 | mmu-miR-28c microT-CDS     | 2     |
| 22.                                                            | mmu-miR-335-5p TargetScan  | 2     | 22.                                                                 | mmu-miR-140-5p Tarbase     | 1     |
| 23.                                                            | mmu-miR-880-3p microT-CDS  | 2     | 23.                                                                 | mmu-miR-31-5p TargetScan   | 1     |
| 24.                                                            | mmu-miR-10b-5p TargetScan  | 1     | 24.                                                                 | mmu-miR-467e-5p microT-CDS | 1     |
| 25.                                                            | mmu-miR-28c microT-CDS     | 3     |                                                                     |                            |       |
| 26.                                                            | mmu-miR-467e-5p microT-CDS | 1     |                                                                     |                            |       |
|                                                                |                            |       |                                                                     |                            |       |
|                                                                |                            |       |                                                                     |                            |       |
|                                                                |                            |       |                                                                     |                            |       |
| 23/28 miRNA involved in Osteoclasts differentiation (mmu04380) |                            | Genes | 24/28 miRNA involved in Regulation of actin cytoskeleton (mmu04810) |                            | Genes |
| 1.                                                             | mmu-miR-19b-3p Tarbase     | 22    | 1.                                                                  | mmu-miR-23b-3p Tarbase     | 22    |
| 2.                                                             | mmu-miR-10a-5p microT-CDS  | 4     | 2.                                                                  | mmu-miR-19b-3p Tarbase     | 30    |
| 3.                                                             | mmu-miR-144-3p microT-CDS  | 5     | 3.                                                                  | mmu-miR-425-5p microT-CDS  | 1     |
| 4.                                                             | mmu-miR-15b-5p microT-CDS  | 7     | 4.                                                                  | mmu-miR-21a-5p microT-CDS  | 6     |
| 5.                                                             | mmu-miR-146a-5p Tarbase    | 1     | 5.                                                                  | mmu-miR-29a-3p Tarbase     | 15    |
| 6.                                                             | mmu-miR-28c microT-CDS     | 2     | 6.                                                                  | mmu-miR-15b-5p microT-CDS  | 7     |
| 7.                                                             | mmu-miR-23b-3p Tarbase     | 12    | 7.                                                                  | mmu-miR-295-3p microT-CDS  | 8     |
| 8.                                                             | mmu-miR-96-5p microT-CDS   | 8     | 8.                                                                  | mmu-miR-183-5p TargetScan  | 1     |
| 9.                                                             | mmu-miR-182-5p microT-CDS  | 7     | 9.                                                                  | mmu-miR-142a-3p microT-CDS | 10    |
| 10.                                                            | mmu-miR-295-3p microT-CDS  | 4     | 10.                                                                 | mmu-miR-140-5p Tarbase     | 2     |
| 11.                                                            | mmu-miR-9-5p microT-CDS    | 6     | 11.                                                                 | mmu-miR-144-3p microT-CDS  | 3     |
| 12.                                                            | mmu-miR-142a-3p microT-CDS | 3     | 12.                                                                 | mmu-miR-182-5p microT-CDS  | 15    |
| 13.                                                            | mmu-miR-140-5p Tarbase     | 4     | 13.                                                                 | mmu-miR-10a-5p microT-CDS  | 2     |
| 14.                                                            | mmu-miR-32-5p microT-CDS   | 4     | 14.                                                                 | mmu-miR-10b-5p TargetScan  | 1     |
| 15.                                                            | mmu-miR-425-5p microT-CDS  | 2     | 15.                                                                 | mmu-miR-467e-5p microT-CDS | 1     |
| 16.                                                            | mmu-miR-22-5p microT-CDS   | 3     | 16.                                                                 | mmu-miR-126a-3p TargetScan | 1     |
| 17.                                                            | mmu-miR-10b-5p TargetScan  | 1     | 17.                                                                 | mmu-miR-22-5p microT-CDS   | 2     |
| 18.                                                            | mmu-miR-29a-3p Tarbase     | 6     | 18.                                                                 | mmu-miR-146a-5p Tarbase    | 9     |
| 19.                                                            | mmu-miR-467e-5p microT-CDS | 1     | 19.                                                                 | mmu-miR-196b-5p microT-CDS | 7     |
| 20.                                                            | mmu-miR-335-5p TargetScan  | 1     | 20.                                                                 | mmu-miR-196a-5p microT-CDS | 6     |
| 21.                                                            | mmu-miR-21a-5p microT-CDS  | 1     | 21.                                                                 | mmu-miR-96-5p microT-CDS   | 22    |
| 22.                                                            | mmu-miR-196b-5p microT-CDS | 1     | 22.                                                                 | mmu-miR-32-5p microT-CDS   | 10    |
| 23.                                                            | mmu-miR-196a-5p microT-CDS | 1     | 23.                                                                 | mmu-miR-9-5p microT-CDS    | 17    |
|                                                                |                            |       | 24.                                                                 | mmu-miR-880-3p microT-CDS  | 2     |

**S1C.** Group 3 miRNAs involved in selected pathways, showing the number of predicted target genes for each of them, as identified by Tarbase v.8 or MicroT-CDS v.5.0 databases.

| 4/6 miRNA involved in ECM-receptor interaction (mmu04512) |                            | Genes | 6/6 miRNA involved in Focal adhesion (mmu04510) |                            | Genes |
|-----------------------------------------------------------|----------------------------|-------|-------------------------------------------------|----------------------------|-------|
| 1.                                                        | mmu-miR-29b-3p Tarbase     | 19    | 1.                                              | mmu-miR-29b-3p Tarbase     | 44    |
| 2.                                                        | mmu-miR-302d-3p microT-CDS | 3     | 2.                                              | mmu-miR-302d-3p microT-CDS | 5     |
| 3.                                                        | mmu-miR-295-3p microT-CDS  | 2     | 3.                                              | mmu-miR-295-3p microT-CDS  | 7     |
| 4.                                                        | mmu-miR-880-3p microT-CDS  | 1     | 4.                                              | mmu-miR-488-3p microT-CDS  | 4     |
|                                                           |                            |       | 5.                                              | mmu-miR-141-3p Tarbase     | 2     |
|                                                           |                            |       | 6.                                              | mmu-miR-880-3p microT-CDS  | 2     |
| 6/6 miRNA involved in MAPK signaling pathway (mmu04010)   |                            | Genes |                                                 |                            |       |
| 1.                                                        | mmu-miR-488-3p microT-CDS  | 7     |                                                 |                            |       |
| 2.                                                        | mmu-miR-29b-3p Tarbase     | 30    |                                                 |                            |       |
| 3.                                                        | mmu-miR-302d-3p microT-CDS | 11    |                                                 |                            |       |
| 4.                                                        | mmu-miR-295-3p microT-CDS  | 5     |                                                 |                            |       |
| 5.                                                        | mmu-miR-141-3p microT-CDS  | 6     |                                                 |                            |       |
| 6.                                                        | mmu-miR-880-3p microT-CDS  | 2     |                                                 |                            |       |

**S1D.** Group 4 miRNAs involved in selected pathways, showing the number of predicted target genes for each of them, as identified by Tarbase v.8 or MicroT-CDS v.5.0 databases.

| 4/4 miRNA involved in MAPK pathway (mmu04010)                     |                            | Genes | 4/4 miRNA involved in Adherens junction (mmu04520) |                            | Genes |
|-------------------------------------------------------------------|----------------------------|-------|----------------------------------------------------|----------------------------|-------|
| 1.                                                                | mmu-let-7i-5p Tarbase      | 45    | 1.                                                 | mmu-miR-138-5p Tarbase     | 6     |
| 2.                                                                | mmu-miR-23a-3p Tarbase     | 21    | 2.                                                 | mmu-let-7i-5p Tarbase      | 19    |
| 3.                                                                | mmu-miR-291a-3p microT-CDS | 14    | 3.                                                 | mmu-miR-23a-3p Tarbase     | 7     |
| 4.                                                                | mmu-miR-138-5p Tarbase     | 8     | 4.                                                 | mmu-miR-291a-3p microT-CDS | 1     |
|                                                                   |                            |       |                                                    |                            |       |
|                                                                   |                            |       |                                                    |                            |       |
| 4/4 miRNA involved in Regulation of actin cytoskeleton (mmu04810) |                            | Genes | 4/4 miRNA involved in Focal Adhesion (mmu04510)    |                            | Genes |
| 1.                                                                | mmu-miR-291a-3p microT-CDS | 9     | 1.                                                 | mmu-let-7i-5p Tarbase      | 34    |
| 2.                                                                | mmu-miR-23a-3p Tarbase     | 22    | 2.                                                 | mmu-miR-138-5p Tarbase     | 14    |
| 3.                                                                | mmu-miR-138-5p Tarbase     | 10    | 3.                                                 | mmu-miR-23a-3p Tarbase     | 13    |
| 4.                                                                | mmu-let-7i-5p Tarbase      | 30    | 4.                                                 | mmu-miR-291a-3p microT-CDS | 6     |

S2A. Lists of genes involved in MAPK pathway (mmu04010) as predicted targets of the Group 1 miRNAs

| Gene Name |                 | Gene Ensembl id                     | Gene Name |                 | Gene Ensembl id                     |
|-----------|-----------------|-------------------------------------|-----------|-----------------|-------------------------------------|
| 1.        | <b>Fgfr3</b>    | <a href="#">ENSMUSG00000054252</a>  | 33.       | <b>Mapk9</b>    | <a href="#">ENSMUSG00000020366</a>  |
| 2.        | <b>Mapk14</b>   | <a href="#">ENSMUSG00000053436</a>  | 34.       | <b>Tgfb2</b>    | <a href="#">ENSMUSG00000032440</a>  |
| 3.        | <b>Rasgrp1</b>  | <a href="#">ENSMUSG00000027347</a>  | 35.       | <b>Nras</b>     | <a href="#">ENSMUSG00000027852</a>  |
| 4.        | <b>Rasa2</b>    | <a href="#">ENSMUSG00000032413</a>  | 36.       | <b>Rac1</b>     | <a href="#">ENSMUSG00000001847</a>  |
| 5.        | <b>Mef2c</b>    | <a href="#">ENSMUSG00000005583</a>  | 37.       | <b>Sos1</b>     | <a href="#">ENSMUSG00000024241</a>  |
| 6.        | <b>Pdgfrb</b>   | <a href="#">ENSMUSG00000024620</a>  | 38.       | <b>Rap1b</b>    | <a href="#">ENSMUSG00000052681</a>  |
| 7.        | <b>Tnfrsf1a</b> | <a href="#">ENSMUSG00000030341</a>  | 39.       | <b>Prkaca</b>   | <a href="#">ENSMUSG00000005469</a>  |
| 8.        | <b>Rps6ka6</b>  | <a href="#">ENSMUSG00000025665</a>  | 40.       | <b>Rras2</b>    | <a href="#">ENSMUSG00000055723</a>  |
| 9.        | <b>Rap1a</b>    | <a href="#">ENSMUSG000000068798</a> | 41.       | <b>Rasa1</b>    | <a href="#">ENSMUSG00000021549</a>  |
| 10.       | <b>Rps6ka5</b>  | <a href="#">ENSMUSG000000021180</a> | 42.       | <b>Cdc25b</b>   | <a href="#">ENSMUSG00000027330</a>  |
| 11.       | <b>Map4k4</b>   | <a href="#">ENSMUSG00000026074</a>  | 43.       | <b>Crk</b>      | <a href="#">ENSMUSG00000017776</a>  |
| 12.       | <b>Fgf4</b>     | <a href="#">ENSMUSG000000050917</a> | 44.       | <b>Prkca</b>    | <a href="#">ENSMUSG000000050965</a> |
| 13.       | <b>Ppm1a</b>    | <a href="#">ENSMUSG000000021096</a> | 45.       | <b>Dusp10</b>   | <a href="#">ENSMUSG00000039384</a>  |
| 14.       | <b>Map2k6</b>   | <a href="#">ENSMUSG00000020623</a>  | 46.       | <b>Tnf</b>      | <a href="#">ENSMUSG00000024401</a>  |
| 15.       | <b>Map3k1</b>   | <a href="#">ENSMUSG000000021754</a> | 47.       | <b>Elk4</b>     | <a href="#">ENSMUSG00000026436</a>  |
| 16.       | <b>Dusp2</b>    | <a href="#">ENSMUSG00000027368</a>  | 48.       | <b>Map3k5</b>   | <a href="#">ENSMUSG00000071369</a>  |
| 17.       | <b>Il1r1</b>    | <a href="#">ENSMUSG00000026072</a>  | 49.       | <b>Stk4</b>     | <a href="#">ENSMUSG000000018209</a> |
| 18.       | <b>Rps6ka3</b>  | <a href="#">ENSMUSG000000031309</a> | 50.       | <b>Mapk8ip3</b> | <a href="#">ENSMUSG00000024163</a>  |
| 19.       | <b>Nfatc3</b>   | <a href="#">ENSMUSG000000031902</a> | 51.       | <b>Ppp3r1</b>   | <a href="#">ENSMUSG000000033953</a> |
| 20.       | <b>Pak1</b>     | <a href="#">ENSMUSG000000030774</a> | 52.       | <b>Ppp3ca</b>   | <a href="#">ENSMUSG00000028161</a>  |
| 21.       | <b>Fasl</b>     | <a href="#">ENSMUSG00000000817</a>  | 53.       | <b>Pak2</b>     | <a href="#">ENSMUSG00000022781</a>  |
| 22.       | <b>Casp3</b>    | <a href="#">ENSMUSG000000031628</a> | 54.       | <b>Atf2</b>     | <a href="#">ENSMUSG00000027104</a>  |
| 23.       | <b>Rapgef2</b>  | <a href="#">ENSMUSG000000062232</a> | 55.       | <b>Dusp5</b>    | <a href="#">ENSMUSG00000034765</a>  |
| 24.       | <b>Ntrk2</b>    | <a href="#">ENSMUSG000000055254</a> | 56.       | <b>Fgf2</b>     | <a href="#">ENSMUSG000000037225</a> |
| 25.       | <b>Nf1</b>      | <a href="#">ENSMUSG000000020716</a> | 57.       | <b>Cdc42</b>    | <a href="#">ENSMUSG00000006699</a>  |
| 26.       | <b>Atf4</b>     | <a href="#">ENSMUSG000000042406</a> | 58.       | <b>Map3k2</b>   | <a href="#">ENSMUSG00000024383</a>  |
| 27.       | <b>Ppp3cb</b>   | <a href="#">ENSMUSG000000021816</a> | 59.       | <b>Tab2</b>     | <a href="#">ENSMUSG000000015755</a> |
| 28.       | <b>Prkx</b>     | <a href="#">ENSMUSG000000035725</a> | 60.       | <b>Myc</b>      | <a href="#">ENSMUSG00000022346</a>  |
| 29.       | <b>Crkl</b>     | <a href="#">ENSMUSG000000006134</a> | 61.       | <b>Mapk8</b>    | <a href="#">ENSMUSG00000021936</a>  |
| 30.       | <b>Egfr</b>     | <a href="#">ENSMUSG000000020122</a> | 62.       | <b>Ppp5c</b>    | <a href="#">ENSMUSG00000003099</a>  |
| 31.       | <b>Kras</b>     | <a href="#">ENSMUSG000000030265</a> | 63.       | <b>Srf</b>      | <a href="#">ENSMUSG000000015605</a> |
| 32.       | <b>Braf</b>     | <a href="#">ENSMUSG000000002413</a> |           |                 |                                     |

**S2B.** Lists of genes involved in MAPK pathway (mmu04010) as predicted targets of the Group 2 miRNAs

| Gene Name |          | Gene Ensembl id                     | Gene Name |          | Gene Ensembl id                    |
|-----------|----------|-------------------------------------|-----------|----------|------------------------------------|
| 1.        | Tgfb2    | <a href="#">ENSMUSG00000039239</a>  | 54.       | Cacna1e  | <a href="#">ENSMUSG00000004110</a> |
| 2.        | Mapk14   | <a href="#">ENSMUSG00000053436</a>  | 55.       | Egfr     | <a href="#">ENSMUSG00000020122</a> |
| 3.        | Rasgrp1  | <a href="#">ENSMUSG00000027347</a>  | 56.       | Ntf5     | <a href="#">ENSMUSG00000074121</a> |
| 4.        | Sos2     | <a href="#">ENSMUSG00000034801</a>  | 57.       | Map2k4   | <a href="#">ENSMUSG00000033352</a> |
| 5.        | Fgf10    | <a href="#">ENSMUSG00000021732</a>  | 58.       | Fgf13    | <a href="#">ENSMUSG00000031137</a> |
| 6.        | Stk3     | <a href="#">ENSMUSG00000022329</a>  | 59.       | Kras     | <a href="#">ENSMUSG00000030265</a> |
| 7.        | Rasa2    | <a href="#">ENSMUSG00000032413</a>  | 60.       | Braf     | <a href="#">ENSMUSG00000002413</a> |
| 8.        | Stmn1    | <a href="#">ENSMUSG00000028832</a>  | 61.       | Mapk9    | <a href="#">ENSMUSG00000020366</a> |
| 9.        | Mef2c    | <a href="#">ENSMUSG00000005583</a>  | 62.       | Tgfb2    | <a href="#">ENSMUSG00000032440</a> |
| 10.       | Jun      | <a href="#">ENSMUSG00000052684</a>  | 63.       | Mecom    | <a href="#">ENSMUSG00000027684</a> |
| 11.       | Map3k3   | <a href="#">ENSMUSG00000020700</a>  | 64.       | Nras     | <a href="#">ENSMUSG00000027852</a> |
| 12.       | Pdgfrb   | <a href="#">ENSMUSG00000024620</a>  | 65.       | Rac1     | <a href="#">ENSMUSG00000001847</a> |
| 13.       | Dusp6    | <a href="#">ENSMUSG00000019960</a>  | 66.       | Sos1     | <a href="#">ENSMUSG00000024241</a> |
| 14.       | Map4k3   | <a href="#">ENSMUSG00000024242</a>  | 67.       | Cacng2   | <a href="#">ENSMUSG00000019146</a> |
| 15.       | Max      | <a href="#">ENSMUSG00000059436</a>  | 68.       | Rap1b    | <a href="#">ENSMUSG00000052681</a> |
| 16.       | Rps6ka6  | <a href="#">ENSMUSG00000025665</a>  | 69.       | Mras     | <a href="#">ENSMUSG00000032470</a> |
| 17.       | Rap1a    | <a href="#">ENSMUSG000000068798</a> | 70.       | Map2k7   | <a href="#">ENSMUSG00000002948</a> |
| 18.       | Rps6ka5  | <a href="#">ENSMUSG000000021180</a> | 71.       | Ras2     | <a href="#">ENSMUSG00000055723</a> |
| 19.       | Map4k4   | <a href="#">ENSMUSG00000026074</a>  | 72.       | Rasa1    | <a href="#">ENSMUSG00000021549</a> |
| 20.       | Map2k1   | <a href="#">ENSMUSG00000004936</a>  | 73.       | Tgfb3    | <a href="#">ENSMUSG00000021253</a> |
| 21.       | Fgf7     | <a href="#">ENSMUSG00000027208</a>  | 74.       | Cdc25b   | <a href="#">ENSMUSG00000027330</a> |
| 22.       | Ppm1a    | <a href="#">ENSMUSG00000021096</a>  | 75.       | Fgf18    | <a href="#">ENSMUSG00000057967</a> |
| 23.       | Fos      | <a href="#">ENSMUSG00000021250</a>  | 76.       | Crk      | <a href="#">ENSMUSG00000017776</a> |
| 24.       | Map2k6   | <a href="#">ENSMUSG00000020623</a>  | 77.       | Prkca    | <a href="#">ENSMUSG00000050965</a> |
| 25.       | Map3k1   | <a href="#">ENSMUSG00000021754</a>  | 78.       | Dusp10   | <a href="#">ENSMUSG00000039384</a> |
| 26.       | Rps6ka4  | <a href="#">ENSMUSG00000024952</a>  | 79.       | Tnf      | <a href="#">ENSMUSG00000024401</a> |
| 27.       | Rps6ka1  | <a href="#">ENSMUSG00000003644</a>  | 80.       | Nfkb1    | <a href="#">ENSMUSG00000028163</a> |
| 28.       | Fgf12    | <a href="#">ENSMUSG00000022523</a>  | 81.       | Mapkapk2 | <a href="#">ENSMUSG00000016528</a> |
| 29.       | Map2k3   | <a href="#">ENSMUSG00000018932</a>  | 82.       | Elk1     | <a href="#">ENSMUSG00000009406</a> |
| 30.       | Mknk2    | <a href="#">ENSMUSG00000020190</a>  | 83.       | Cacna2d2 | <a href="#">ENSMUSG00000010066</a> |
| 31.       | Cacnb2   | <a href="#">ENSMUSG00000057914</a>  | 84.       | Stk4     | <a href="#">ENSMUSG00000018209</a> |
| 32.       | Dusp2    | <a href="#">ENSMUSG00000027368</a>  | 85.       | Fgf9     | <a href="#">ENSMUSG00000021974</a> |
| 33.       | Cacna2d1 | <a href="#">ENSMUSG00000040118</a>  | 86.       | Ppp3r1   | <a href="#">ENSMUSG00000033953</a> |
| 34.       | Rps6ka3  | <a href="#">ENSMUSG00000031309</a>  | 87.       | Traf6    | <a href="#">ENSMUSG00000027164</a> |
| 35.       | Grb2     | <a href="#">ENSMUSG00000059923</a>  | 88.       | Fgfr2    | <a href="#">ENSMUSG00000030849</a> |
| 36.       | Nfatc3   | <a href="#">ENSMUSG00000031902</a>  | 89.       | Prkacb   | <a href="#">ENSMUSG00000005034</a> |
| 37.       | Map3k4   | <a href="#">ENSMUSG00000014426</a>  | 90.       | Arrb1    | <a href="#">ENSMUSG00000018909</a> |
| 38.       | Pak1     | <a href="#">ENSMUSG00000030774</a>  | 91.       | Pla2g4a  | <a href="#">ENSMUSG00000056220</a> |
| 39.       | Fasl     | <a href="#">ENSMUSG00000000817</a>  | 92.       | Flnc     | <a href="#">ENSMUSG00000068699</a> |
| 40.       | Cacnb1   | <a href="#">ENSMUSG00000020882</a>  | 93.       | Mapk11   | <a href="#">ENSMUSG00000053137</a> |
| 41.       | Cacnb4   | <a href="#">ENSMUSG00000017412</a>  | 94.       | Pak2     | <a href="#">ENSMUSG00000022781</a> |
| 42.       | Casp3    | <a href="#">ENSMUSG00000031628</a>  | 95.       | Atf2     | <a href="#">ENSMUSG00000027104</a> |
| 43.       | Rapgef2  | <a href="#">ENSMUSG00000062232</a>  | 96.       | Map3k7   | <a href="#">ENSMUSG00000028284</a> |
| 44.       | Dusp7    | <a href="#">ENSMUSG00000053716</a>  | 97.       | Dusp5    | <a href="#">ENSMUSG00000034765</a> |
| 45.       | Nlk      | <a href="#">ENSMUSG00000017376</a>  | 98.       | Cdc42    | <a href="#">ENSMUSG00000006699</a> |
| 46.       | Cacna1i  | <a href="#">ENSMUSG00000022416</a>  | 99.       | Map3k2   | <a href="#">ENSMUSG00000024383</a> |
| 47.       | Tgfb1    | <a href="#">ENSMUSG00000007613</a>  | 100.      | Map3k11  | <a href="#">ENSMUSG00000004054</a> |
| 48.       | Rasgrf1  | <a href="#">ENSMUSG00000032356</a>  | 101.      | Tab2     | <a href="#">ENSMUSG00000015755</a> |
| 49.       | Nf1      | <a href="#">ENSMUSG00000020716</a>  | 102.      | Mapk8    | <a href="#">ENSMUSG00000021936</a> |
| 50.       | Atf4     | <a href="#">ENSMUSG00000042406</a>  | 103.      | Zak      | <a href="#">ENSMUSG00000004085</a> |
| 51.       | Ppm1b    | <a href="#">ENSMUSG000000061130</a> | 104.      | Srf      | <a href="#">ENSMUSG00000015605</a> |
| 52.       | Dusp16   | <a href="#">ENSMUSG00000030203</a>  | 105.      | Dusp8    | <a href="#">ENSMUSG00000037887</a> |
| 53.       | Cacna1d  | <a href="#">ENSMUSG00000015968</a>  |           |          |                                    |

S2C. Lists of genes involved in MAPK pathway (mmu04010) as predicted targets of the Group 3 miRNAs

| Gene Name      Gene Ensembl id |                |                                    | Gene Name      Gene Ensembl id |                |                                    |
|--------------------------------|----------------|------------------------------------|--------------------------------|----------------|------------------------------------|
| 1.                             | <b>Fgfr3</b>   | <a href="#">ENSMUSG00000054252</a> | 26.                            | <b>Map2k4</b>  | <a href="#">ENSMUSG00000033352</a> |
| 2.                             | <b>Mapk14</b>  | <a href="#">ENSMUSG00000053436</a> | 27.                            | <b>Braf</b>    | <a href="#">ENSMUSG00000002413</a> |
| 3.                             | <b>Rasgrp</b>  | <a href="#">ENSMUSG00000027347</a> | 28.                            | <b>Tgfbr2</b>  | <a href="#">ENSMUSG00000032440</a> |
| 4.                             | <b>Sos2</b>    | <a href="#">ENSMUSG00000034801</a> | 29.                            | <b>Nras</b>    | <a href="#">ENSMUSG00000027852</a> |
| 5.                             | <b>Fgf10</b>   | <a href="#">ENSMUSG00000021732</a> | 30.                            | <b>Sos1</b>    | <a href="#">ENSMUSG00000024241</a> |
| 6.                             | <b>Stk3</b>    | <a href="#">ENSMUSG00000022329</a> | 31.                            | <b>Rap1b</b>   | <a href="#">ENSMUSG00000052681</a> |
| 7.                             | <b>Mef2c</b>   | <a href="#">ENSMUSG00000005583</a> | 32.                            | <b>Rras2</b>   | <a href="#">ENSMUSG00000055723</a> |
| 8.                             | <b>Pdgfrb</b>  | <a href="#">ENSMUSG00000024620</a> | 33.                            | <b>Tgfb3</b>   | <a href="#">ENSMUSG00000021253</a> |
| 9.                             | <b>Rps6ka6</b> | <a href="#">ENSMUSG00000025665</a> | 34.                            | <b>Tgfb1</b>   | <a href="#">ENSMUSG00000002603</a> |
| 10.                            | <b>Rap1a</b>   | <a href="#">ENSMUSG00000068798</a> | 35.                            | <b>Cdc25b</b>  | <a href="#">ENSMUSG00000027330</a> |
| 11.                            | <b>Rps6ka5</b> | <a href="#">ENSMUSG00000021180</a> | 36.                            | <b>Pdgfb</b>   | <a href="#">ENSMUSG00000000489</a> |
| 12.                            | <b>Flnb</b>    | <a href="#">ENSMUSG00000025278</a> | 37.                            | <b>Crk</b>     | <a href="#">ENSMUSG00000017776</a> |
| 13.                            | <b>Tab1</b>    | <a href="#">ENSMUSG00000022414</a> | 38.                            | <b>Prkca</b>   | <a href="#">ENSMUSG00000050965</a> |
| 14.                            | <b>Map2k6</b>  | <a href="#">ENSMUSG00000020623</a> | 39.                            | <b>Dusp10</b>  | <a href="#">ENSMUSG00000039384</a> |
| 15.                            | <b>Map3k1</b>  | <a href="#">ENSMUSG00000021754</a> | 40.                            | <b>Elk1</b>    | <a href="#">ENSMUSG00000009406</a> |
| 16.                            | <b>Rps6ka1</b> | <a href="#">ENSMUSG00000003644</a> | 41.                            | <b>Stk4</b>    | <a href="#">ENSMUSG00000018209</a> |
| 17.                            | <b>Mknk2</b>   | <a href="#">ENSMUSG00000020190</a> | 42.                            | <b>Fgf9</b>    | <a href="#">ENSMUSG00000021974</a> |
| 18.                            | <b>Dusp2</b>   | <a href="#">ENSMUSG00000027368</a> | 43.                            | <b>Ppp3r1</b>  | <a href="#">ENSMUSG00000033953</a> |
| 19.                            | <b>Il1r1</b>   | <a href="#">ENSMUSG00000026072</a> | 44.                            | <b>Fgfr2</b>   | <a href="#">ENSMUSG00000030849</a> |
| 20.                            | <b>Rps6ka3</b> | <a href="#">ENSMUSG00000031309</a> | 45.                            | <b>Cdc42</b>   | <a href="#">ENSMUSG00000006699</a> |
| 21.                            | <b>Nfatc3</b>  | <a href="#">ENSMUSG00000031902</a> | 46.                            | <b>Map3k2</b>  | <a href="#">ENSMUSG00000024383</a> |
| 22.                            | <b>Fasl</b>    | <a href="#">ENSMUSG00000000817</a> | 47.                            | <b>Map3k11</b> | <a href="#">ENSMUSG00000004054</a> |
| 23.                            | <b>Casp3</b>   | <a href="#">ENSMUSG00000031628</a> | 48.                            | <b>Tab2</b>    | <a href="#">ENSMUSG00000015755</a> |
| 24.                            | <b>Ppp3cb</b>  | <a href="#">ENSMUSG00000021816</a> | 49.                            | <b>Mapk8</b>   | <a href="#">ENSMUSG00000021936</a> |
| 25.                            | <b>Egfr</b>    | <a href="#">ENSMUSG00000020122</a> | 50.                            | <b>Srf</b>     | <a href="#">ENSMUSG00000015605</a> |

S2D. Lists of genes involved in MAPK pathway (mmu04010) as predicted targets of the Group 4 miRNAs

| Gene Name |          | Gene Ensembl id                    | Gene Name |          | Gene Ensembl id                    |
|-----------|----------|------------------------------------|-----------|----------|------------------------------------|
| 1.        | Rasgrp1  | <a href="#">ENSMUSG00000027347</a> | 36.       | Kras     | <a href="#">ENSMUSG00000030265</a> |
| 2.        | Fgf10    | <a href="#">ENSMUSG00000021732</a> | 37.       | Mapk9    | <a href="#">ENSMUSG00000020366</a> |
| 3.        | Mapt     | <a href="#">ENSMUSG00000018411</a> | 38.       | Tgfb2    | <a href="#">ENSMUSG00000032440</a> |
| 4.        | Rasa2    | <a href="#">ENSMUSG00000032413</a> | 39.       | Nras     | <a href="#">ENSMUSG00000027852</a> |
| 5.        | Mef2c    | <a href="#">ENSMUSG00000005583</a> | 40.       | Map3k14  | <a href="#">ENSMUSG00000020941</a> |
| 6.        | Map3k3   | <a href="#">ENSMUSG00000020700</a> | 41.       | Sos1     | <a href="#">ENSMUSG00000024241</a> |
| 7.        | Pdgfrb   | <a href="#">ENSMUSG00000024620</a> | 42.       | Rras2    | <a href="#">ENSMUSG00000055723</a> |
| 8.        | Tnfrsf1a | <a href="#">ENSMUSG00000030341</a> | 43.       | Dusp3    | <a href="#">ENSMUSG0000003518</a>  |
| 9.        | Cacng4   | <a href="#">ENSMUSG00000020723</a> | 44.       | Dusp4    | <a href="#">ENSMUSG00000031530</a> |
| 10.       | Dusp6    | <a href="#">ENSMUSG00000019960</a> | 45.       | Tgfb1    | <a href="#">ENSMUSG0000002603</a>  |
| 11.       | Map4k3   | <a href="#">ENSMUSG00000024242</a> | 46.       | Chuk     | <a href="#">ENSMUSG00000025199</a> |
| 12.       | Max      | <a href="#">ENSMUSG00000059436</a> | 47.       | Crk      | <a href="#">ENSMUSG00000017776</a> |
| 13.       | Rps6ka5  | <a href="#">ENSMUSG00000021180</a> | 48.       | Prkca    | <a href="#">ENSMUSG00000050965</a> |
| 14.       | Map4k4   | <a href="#">ENSMUSG00000026074</a> | 49.       | Elk4     | <a href="#">ENSMUSG00000026436</a> |
| 15.       | Cacna2d3 | <a href="#">ENSMUSG00000021991</a> | 50.       | Nfkb1    | <a href="#">ENSMUSG00000028163</a> |
| 16.       | Map3k1   | <a href="#">ENSMUSG00000021754</a> | 51.       | Stk4     | <a href="#">ENSMUSG00000018209</a> |
| 17.       | Rps6ka1  | <a href="#">ENSMUSG00000003644</a> | 52.       | Fgf9     | <a href="#">ENSMUSG00000021974</a> |
| 18.       | Mknk2    | <a href="#">ENSMUSG00000020190</a> | 53.       | Mapk8ip3 | <a href="#">ENSMUSG00000024163</a> |
| 19.       | Dusp2    | <a href="#">ENSMUSG00000027368</a> | 54.       | Ppp3r1   | <a href="#">ENSMUSG00000033953</a> |
| 20.       | Rps6ka3  | <a href="#">ENSMUSG00000031309</a> | 55.       | Rac2     | <a href="#">ENSMUSG00000033220</a> |
| 21.       | Nfatc3   | <a href="#">ENSMUSG00000031902</a> | 56.       | Ppp3ca   | <a href="#">ENSMUSG00000028161</a> |
| 22.       | Map3k4   | <a href="#">ENSMUSG00000014426</a> | 57.       | Prkacb   | <a href="#">ENSMUSG00000005034</a> |
| 23.       | Pak1     | <a href="#">ENSMUSG00000030774</a> | 58.       | Mapk11   | <a href="#">ENSMUSG00000053137</a> |
| 24.       | Casp3    | <a href="#">ENSMUSG00000031628</a> | 59.       | Pak2     | <a href="#">ENSMUSG00000022781</a> |
| 25.       | Dusp7    | <a href="#">ENSMUSG00000053716</a> | 60.       | Atf2     | <a href="#">ENSMUSG00000027104</a> |
| 26.       | Nlk      | <a href="#">ENSMUSG00000017376</a> | 61.       | Dusp5    | <a href="#">ENSMUSG00000034765</a> |
| 27.       | Ntrk2    | <a href="#">ENSMUSG00000055254</a> | 62.       | Fgf2     | <a href="#">ENSMUSG00000037225</a> |
| 28.       | Tgfb1    | <a href="#">ENSMUSG00000007613</a> | 63.       | Cdc42    | <a href="#">ENSMUSG00000006699</a> |
| 29.       | Rasgrf1  | <a href="#">ENSMUSG00000032356</a> | 64.       | Map3k2   | <a href="#">ENSMUSG00000024383</a> |
| 30.       | Nf1      | <a href="#">ENSMUSG00000020716</a> | 65.       | Map3k11  | <a href="#">ENSMUSG00000004054</a> |
| 31.       | Atf4     | <a href="#">ENSMUSG00000042406</a> | 66.       | Tab2     | <a href="#">ENSMUSG00000015755</a> |
| 32.       | Il1a     | <a href="#">ENSMUSG00000027399</a> | 67.       | Dusp1    | <a href="#">ENSMUSG00000024190</a> |
| 33.       | Crkl     | <a href="#">ENSMUSG00000006134</a> | 68.       | Rras     | <a href="#">ENSMUSG00000038387</a> |
| 34.       | Egfr     | <a href="#">ENSMUSG00000020122</a> | 69.       | Srf      | <a href="#">ENSMUSG00000015605</a> |
| 35.       | Map2k4   | <a href="#">ENSMUSG00000033352</a> | 70.       | Dusp8    | <a href="#">ENSMUSG00000037887</a> |

**Table S3.** List of the main genes involved in pathways regulated by the differentially expressed miRNAs highlighted in PCR arrays.

| GENE NAME                | miRNA   | miRNA   | miRNA   | miRNA  | miRNA   | miRNA  | miRNA  | miRNA  |
|--------------------------|---------|---------|---------|--------|---------|--------|--------|--------|
| CREB1                    | 29a-3p  | 23b-3p  | 10a-5p  | 15b-5p | 19a-3p  | 23a-3p | 138-5p | 124-3p |
| CREBbp                   | 29b-3p  | 19a-3p  | 19b-3p  | 9-5p   | 7i-5p   | 124-3p |        |        |
| MAP2K3 (MKK3)            | 29a-3p  |         |         |        |         |        |        |        |
| MAP2K6 (p38 k.)          | 29a-3p  | 29b-3p  |         |        |         |        |        |        |
| MAPK14 (p38- $\alpha$ )  | 31-5p   | 140-5p  | 29a-3p  | 29b-3p | 141-3p  | 124-3p |        |        |
| MAPK11 (p38- $\beta$ )   | 335-5p  | 29a-3p  | 29b-3p  | 7i-5p  |         |        |        |        |
| MAPK12 (p38- $\gamma$ )  | 29a-3p  | 29b-3p  |         |        |         |        |        |        |
| MAPK13 (p38- $\delta$ )  | 29a-3p  | 29b-3p  |         |        |         |        |        |        |
| MAPK8 (JNK1)             | 335-5p  | 196a-5p | 19a-3p  | 19b-3p | 31-5p   | 29a-3p | 29b-3p |        |
| MAPK9 (JNK2)             | 31-5p   | 7i-5p   |         |        |         |        |        |        |
| MAPK10 (JNK3)            | 9-5p    |         |         |        |         |        |        |        |
| MAP3K1 (MEKK1)           | 31-5p   | 23a-3p  | 291a-3p |        |         |        |        |        |
| MAP3K2 (MEKK2)           | 295-3p  | 295-3p  | 141-3p  | 23a-3p | 291a-3p | 124-3p |        |        |
| MAP2K1 (MEK1)            | 22-3p   |         |         |        |         |        |        |        |
| MAPK3 (ERK1)             | 15b-5p  |         |         |        |         |        |        |        |
| MAPK1 (ERK2)             | 141-3p  |         |         |        |         |        |        |        |
| DUSP1                    | 411-5p  | 144-3p  | 31-5p   | 7i-5p  |         |        |        |        |
| DUSP2                    | 295-3p  | 880-3p  | 880-3p  | 295-3p | 291a-3p |        |        |        |
| DUSP3                    | 7i-5p   | 124-3p  |         |        |         |        |        |        |
| DUSP5                    | 7i-5p   | 23a-3p  |         |        |         |        |        |        |
| DUSP6                    | 7i-5p   |         |         |        |         |        |        |        |
| DUSP7                    | 31-5p   | 7i-5p   |         |        |         |        |        |        |
| DUSP8                    | 880-3p  | 880-3p  | 138-5p  | 7i-5p  |         |        |        |        |
| DUSP15                   | 124-3p  |         |         |        |         |        |        |        |
| Rps6ka3                  | 411-5p  | 291a-3p |         |        |         |        |        |        |
| Mef2c                    | 31-5p   | 291a-3p |         |        |         |        |        |        |
| Tnfrsf1a (TNFR1)         | 467e-5p | 142a-3p |         |        |         |        |        |        |
| TNF                      | 30c-5p  | 19a-3p  | 19b-3p  |        |         |        |        |        |
| JunB                     | 30c-5p  | 19a-3p  | 19b-3p  | 15b-5p |         |        |        |        |
| Jun                      | 19b-3p  | 19a-3p  | 15b-5p  |        |         |        |        |        |
| Fos                      | 21a-5p  |         |         |        |         |        |        |        |
| RelA                     | 9-5p    | 124-3p  |         |        |         |        |        |        |
| NFkb1                    | 23b-3p  | 31-5p   | 15b-5p  | 23a-3p |         |        |        |        |
| MAP3K7 (TGF-k)           | 10a-5p  | 23b-3p  | 7i-5p   | 124-3p |         |        |        |        |
| Tgfb1 (TGF- $\beta$ -R1) | 140-5p  | 880-3p  | 880-3p  | 124-3p |         |        |        |        |
| Tgfb2 (TGF- $\beta$ -R2) | 23b-3p  |         |         |        |         |        |        |        |
| TGF-beta                 | 31-5p   | 141-3p  |         |        |         |        |        |        |
| ROCK1                    | 31-5p   | 15b-3p  | 335-5p  | 29b-3p | 141-3p  |        |        |        |
| ROCK2                    | 142a-3p | 23b-3p  | 19a-3p  | 19b-3p | 9-5p    | 141-3p | 23a-3p | 124-3p |
| RhoA                     | 138-5p  | 124-3p  |         |        |         |        |        |        |
| Col1a1                   | 7i-5p   | 138-5p  |         |        |         |        |        |        |
| Col1a2                   | 7i-5p   |         |         |        |         |        |        |        |

|                             |         |         |         |         |                      |        |        |  |
|-----------------------------|---------|---------|---------|---------|----------------------|--------|--------|--|
| Col4a1                      | 7i-5p   | 138-5p  |         |         |                      |        |        |  |
| Col4a2                      | 7i-5p   | 138-5p  |         |         |                      |        |        |  |
| Col5a1                      | 31-5p   |         |         |         |                      |        |        |  |
| Col5a2                      | 7i-5p   |         |         |         |                      |        |        |  |
| Fn1                         | 144-3p  |         |         |         |                      |        |        |  |
| Itgbb3 (integrina)          | 29a-3p  | 23b-3p  | 29b-3p  | 23a-5p  |                      |        |        |  |
| Itgb8                       | 214-3p  | 291a-3p |         |         |                      |        |        |  |
| VEGF                        | 29a-3p  | 15b-5p  | 23b-3p  | 29b-3p  | 23a-5p               | 7i-5p  |        |  |
| HIF-1 $\alpha$              | 144-3p  | 29a-3p  | 21-5p   |         |                      |        |        |  |
| Egrf                        | 10b-5p  | 142a-3p | 29b-3p  | 138-5p  | 23a-5p               | 7i-5p  |        |  |
| Ifngr (IFN- $\gamma$ )      | 29a-3p  | 23b-3p  |         |         |                      |        |        |  |
| SOCS1                       | 19b-3p  | 7i-5p   |         |         |                      |        |        |  |
| SOCS3                       | 29a-3p  | 140-5p  | 19b-3p  |         |                      |        |        |  |
| Sqstm1                      | 144-3p  | 23b-3p  | 23a-5p  |         |                      |        |        |  |
| IL1r1                       | 335-5p  | 29b-3p  |         |         |                      |        |        |  |
| IL-6                        | 142-3p  | 7i-5p   |         |         |                      |        |        |  |
| IL-6r                       | 23b-3p  | 31-5p   | 23a-5p  |         |                      |        |        |  |
| STAT1                       | 23b-3p  | 19b-3p  | 15b-5p  | 19a-3p  | 15b-5p               |        |        |  |
| STAT2                       | 9-5p    | 19b-3p  | 15b-5p  | 19a-3p  | 15b-5p               |        |        |  |
| STAT3                       | 21-5p   | 31-5p   | 7i-5p   |         |                      |        |        |  |
| IRF9                        | 23b-3p  |         |         |         |                      |        |        |  |
| PiK3ca                      | 21a-5p  |         |         |         |                      |        |        |  |
| PiK3r1 reg. sub. $\alpha$   | 15b-3p  | 335-5p  | 29a-3p  | 31-5p   | 138-5p               |        |        |  |
| PiK3r3 reg. sub. $\gamma$   | 19a-3p  | 335-5p  |         |         |                      |        |        |  |
| CAMK4                       | 29a-3p  | 29b-3p  | 138-5p  |         |                      |        |        |  |
| Ppp1cb                      | 141-3p  | 29b-3p  |         |         |                      |        |        |  |
| Ppp3ca                      | 31-5p   | 7i-5p   |         |         |                      |        |        |  |
| Ppp3cb                      | 140-5p  | 15b-5p  | 29b-3p  |         |                      |        |        |  |
| Ppp3r1-2                    | 29a-3p  | 335-5p  | 31-5p   | 29b-3p  | 141-3p               |        |        |  |
| CALMG                       | 411-5p  |         |         |         |                      |        |        |  |
| CALM2                       | 880-3p  | 880-3p  |         |         |                      |        |        |  |
| GSK3 $\beta$                | 199-5p  | 144-3p  | 880-3p  | 880-3p  | 124-3p               |        |        |  |
| DYRK1 -2                    | 295-3p  | 880-3p  | 295-3p  | 880-3p  |                      |        |        |  |
| OSCAR                       | 124-3p  |         |         |         |                      |        |        |  |
| MITF                        | 19b-3p  | 19a-3p  | 144-3p  | 124-3p  |                      |        |        |  |
| TRAF6                       | 19b-3p  | 19a-3p  | 146-3p  | 15b-5p  | 880-3p               | 880-3p | 124-3p |  |
| NFATc2                      | 214-3p  | 19a-3p  | 19b-3p  | 22-3p   | 124-3p               |        |        |  |
| NFATc1                      | 124-3p  |         |         |         |                      |        |        |  |
| ATP6Voa1                    | 214-3p  |         |         |         |                      |        |        |  |
| Ncf1 (NAPDH oxidase factor) | 425-5p  |         |         |         |                      |        |        |  |
| SMAD2                       | 31-5p   | 880-3p  | 295-3p  | 880-3p  | 295-3p               |        |        |  |
| SMAD3                       | 880-3p  | 880-3p  | 23a-3p  |         |                      |        |        |  |
| SMAD4                       | 214-3p  | 31-5p   |         |         |                      |        |        |  |
| COLOR LEGEND                | Group 1 | Group 2 | Group 3 | Group 4 | Inside the threshold |        |        |  |

**S3A.** Lists of genes involved in Regulation of actin cytoskeleton (04810) as predicted targets of the Group 1 miRNAs

| Gene Name |          | Gene Ensembl id                     | Gene Name |         | Gene Ensembl id                    |
|-----------|----------|-------------------------------------|-----------|---------|------------------------------------|
| 1.        | Fgfr3    | <a href="#">ENSMUSG00000054252</a>  | 33.       | Pik3cb  | <a href="#">ENSMUSG00000032462</a> |
| 2.        | Pxn      | <a href="#">ENSMUSG00000029528</a>  | 34.       | Tiam1   | <a href="#">ENSMUSG00000002489</a> |
| 3.        | Apc      | <a href="#">ENSMUSG00000005871</a>  | 35.       | Mylk    | <a href="#">ENSMUSG00000022836</a> |
| 4.        | Ppp1r12b | <a href="#">ENSMUSG00000073557</a>  | 36.       | Itgav   | <a href="#">ENSMUSG00000027087</a> |
| 5.        | Ppp1r12a | <a href="#">ENSMUSG00000019907</a>  | 37.       | Pikfyve | <a href="#">ENSMUSG00000025949</a> |
| 6.        | Pik3r1   | <a href="#">ENSMUSG00000041417</a>  | 38.       | Crk     | <a href="#">ENSMUSG00000017776</a> |
| 7.        | Pik3r3   | <a href="#">ENSMUSG00000028698</a>  | 39.       | Diap2   | <a href="#">ENSMUSG00000034480</a> |
| 8.        | Myl12b   | <a href="#">ENSMUSG00000034868</a>  | 40.       | Vcl     | <a href="#">ENSMUSG00000021823</a> |
| 9.        | Slc9a1   | <a href="#">ENSMUSG00000028854</a>  | 41.       | Abi2    | <a href="#">ENSMUSG00000026782</a> |
| 10.       | Pdgfrb   | <a href="#">ENSMUSG00000024620</a>  | 42.       | F2      | <a href="#">ENSMUSG00000027249</a> |
| 11.       | Wasl     | <a href="#">ENSMUSG00000029684</a>  | 43.       | Ppp1cb  | <a href="#">ENSMUSG00000014956</a> |
| 12.       | Wasf2    | <a href="#">ENSMUSG00000028868</a>  | 44.       | Myh9    | <a href="#">ENSMUSG00000022443</a> |
| 13.       | Fgf4     | <a href="#">ENSMUSG000000050917</a> | 45.       | Ssh2    | <a href="#">ENSMUSG00000037926</a> |
| 14.       | Gsn      | <a href="#">ENSMUSG00000026879</a>  | 46.       | Arhgef6 | <a href="#">ENSMUSG00000031133</a> |
| 15.       | Arhgap35 | <a href="#">ENSMUSG00000058230</a>  | 47.       | Araf    | <a href="#">ENSMUSG00000001127</a> |
| 16.       | Itgb3    | <a href="#">ENSMUSG00000020689</a>  | 48.       | F2r     | <a href="#">ENSMUSG00000048376</a> |
| 17.       | Itgb7    | <a href="#">ENSMUSG00000001281</a>  | 49.       | Arpc1b  | <a href="#">ENSMUSG00000029622</a> |
| 18.       | Pak1     | <a href="#">ENSMUSG00000030774</a>  | 50.       | Itgb1   | <a href="#">ENSMUSG00000025809</a> |
| 19.       | Pfn1     | <a href="#">ENSMUSG00000018293</a>  | 51.       | Itga7   | <a href="#">ENSMUSG00000025348</a> |
| 20.       | Cfl2     | <a href="#">ENSMUSG00000062929</a>  | 52.       | Baiap2  | <a href="#">ENSMUSG00000025372</a> |
| 21.       | Crkl     | <a href="#">ENSMUSG00000006134</a>  | 53.       | Gna13   | <a href="#">ENSMUSG00000020611</a> |
| 22.       | Egfr     | <a href="#">ENSMUSG00000020122</a>  | 54.       | Enah    | <a href="#">ENSMUSG00000022995</a> |
| 23.       | Kras     | <a href="#">ENSMUSG00000030265</a>  | 55.       | Pik3cd  | <a href="#">ENSMUSG00000039936</a> |
| 24.       | Braf     | <a href="#">ENSMUSG00000002413</a>  | 56.       | Ssh1    | <a href="#">ENSMUSG00000042121</a> |
| 25.       | Rdx      | <a href="#">ENSMUSG00000032050</a>  | 57.       | Itgb8   | <a href="#">ENSMUSG00000025321</a> |
| 26.       | Nras     | <a href="#">ENSMUSG00000027852</a>  | 58.       | Myl9    | <a href="#">ENSMUSG00000067818</a> |
| 27.       | Rac1     | <a href="#">ENSMUSG00000001847</a>  | 59.       | Pak2    | <a href="#">ENSMUSG00000022781</a> |
| 28.       | Rock2    | <a href="#">ENSMUSG00000020580</a>  | 60.       | Fgf2    | <a href="#">ENSMUSG00000037225</a> |
| 29.       | Sos1     | <a href="#">ENSMUSG00000024241</a>  | 61.       | Cdc42   | <a href="#">ENSMUSG00000006699</a> |
| 30.       | Actn4    | <a href="#">ENSMUSG00000054808</a>  | 62.       | Pip4k2a | <a href="#">ENSMUSG00000026737</a> |
| 31.       | Rras2    | <a href="#">ENSMUSG00000055723</a>  | 63.       | Fgd1    | <a href="#">ENSMUSG00000025265</a> |
| 32.       | Actn1    | <a href="#">ENSMUSG00000015143</a>  | 64.       | Arpc5   | <a href="#">ENSMUSG00000008475</a> |

**S3B.** Lists of genes involved in Regulation of actin cytoskeleton (04810) as predicted targets of the Group 2 miRNAs

| Gene Name    | Gene Ensembl id                     | Gene Name   | Gene Ensembl id                     |
|--------------|-------------------------------------|-------------|-------------------------------------|
| 1. Vav2      | <a href="#">ENSMUSG00000009621</a>  | 48. Braf    | <a href="#">ENSMUSG00000002413</a>  |
| 2. Sos2      | <a href="#">ENSMUSG000000034801</a> | 49. Rdx     | <a href="#">ENSMUSG000000032050</a> |
| 3. Apc       | <a href="#">ENSMUSG00000005871</a>  | 50. Nckap1  | <a href="#">ENSMUSG000000027002</a> |
| 4. Fgf10     | <a href="#">ENSMUSG000000021732</a> | 51. Nras    | <a href="#">ENSMUSG000000027852</a> |
| 5. Pip5k1c   | <a href="#">ENSMUSG000000034902</a> | 52. Rac1    | <a href="#">ENSMUSG00000001847</a>  |
| 6. Pip4k2b   | <a href="#">ENSMUSG000000018547</a> | 53. Rock2   | <a href="#">ENSMUSG000000020580</a> |
| 7. Pik3r1    | <a href="#">ENSMUSG000000041417</a> | 54. Sos1    | <a href="#">ENSMUSG000000024241</a> |
| 8. Pik3r3    | <a href="#">ENSMUSG000000028698</a> | 55. Itga8   | <a href="#">ENSMUSG000000026768</a> |
| 9. Slc9a1    | <a href="#">ENSMUSG000000028854</a> | 56. Mras    | <a href="#">ENSMUSG000000032470</a> |
| 10. Pdgfrb   | <a href="#">ENSMUSG000000024620</a> | 57. Itgb2   | <a href="#">ENSMUSG00000000290</a>  |
| 11. Arpc5l   | <a href="#">ENSMUSG000000026755</a> | 58. Rras2   | <a href="#">ENSMUSG000000055723</a> |
| 12. Msn      | <a href="#">ENSMUSG000000031207</a> | 59. Actn1   | <a href="#">ENSMUSG000000015143</a> |
| 13. Wasl     | <a href="#">ENSMUSG000000029684</a> | 60. Pik3cb  | <a href="#">ENSMUSG000000032462</a> |
| 14. Diap3    | <a href="#">ENSMUSG000000022021</a> | 61. Tiam1   | <a href="#">ENSMUSG000000002489</a> |
| 15. Wasf2    | <a href="#">ENSMUSG000000028868</a> | 62. Arpc1a  | <a href="#">ENSMUSG000000029621</a> |
| 16. Vav3     | <a href="#">ENSMUSG000000033721</a> | 63. Fgf18   | <a href="#">ENSMUSG000000057967</a> |
| 17. Map2k1   | <a href="#">ENSMUSG000000004936</a> | 64. Itgav   | <a href="#">ENSMUSG000000027087</a> |
| 18. Itga6    | <a href="#">ENSMUSG000000027111</a> | 65. Pikfyve | <a href="#">ENSMUSG000000025949</a> |
| 19. Fgf7     | <a href="#">ENSMUSG000000027208</a> | 66. Crk     | <a href="#">ENSMUSG000000017776</a> |
| 20. Ezr      | <a href="#">ENSMUSG000000052397</a> | 67. Diap2   | <a href="#">ENSMUSG000000034480</a> |
| 21. Gsn      | <a href="#">ENSMUSG000000026879</a> | 68. Vcl     | <a href="#">ENSMUSG000000021823</a> |
| 22. Rock1    | <a href="#">ENSMUSG000000024290</a> | 69. Abi2    | <a href="#">ENSMUSG000000026782</a> |
| 23. Arhgap35 | <a href="#">ENSMUSG000000058230</a> | 70. Ppp1cb  | <a href="#">ENSMUSG000000014956</a> |
| 24. Fgf12    | <a href="#">ENSMUSG000000022523</a> | 71. Myh9    | <a href="#">ENSMUSG000000022443</a> |
| 25. Itgb3    | <a href="#">ENSMUSG000000020689</a> | 72. Arhgef7 | <a href="#">ENSMUSG000000031511</a> |
| 26. Itgb7    | <a href="#">ENSMUSG000000001281</a> | 73. Actg1   | <a href="#">ENSMUSG000000062825</a> |
| 27. Pak1     | <a href="#">ENSMUSG000000030774</a> | 74. Ssh2    | <a href="#">ENSMUSG000000037926</a> |
| 28. Myh10    | <a href="#">ENSMUSG000000020900</a> | 75. Arhgef6 | <a href="#">ENSMUSG000000031133</a> |
| 29. Bdkrb1   | <a href="#">ENSMUSG000000041347</a> | 76. Itga3   | <a href="#">ENSMUSG00000001507</a>  |
| 30. Itga5    | <a href="#">ENSMUSG00000000555</a>  | 77. Fgf9    | <a href="#">ENSMUSG000000021974</a> |
| 31. Pfn1     | <a href="#">ENSMUSG000000018293</a> | 78. F2r     | <a href="#">ENSMUSG000000048376</a> |
| 32. Src      | <a href="#">ENSMUSG000000027646</a> | 79. Arpc1b  | <a href="#">ENSMUSG000000029622</a> |
| 33. Cfl2     | <a href="#">ENSMUSG000000062929</a> | 80. Fgfr2   | <a href="#">ENSMUSG000000030849</a> |
| 34. Ppp1r12c | <a href="#">ENSMUSG000000019254</a> | 81. Itgb1   | <a href="#">ENSMUSG000000025809</a> |
| 35. Actb     | <a href="#">ENSMUSG000000029580</a> | 82. Gna13   | <a href="#">ENSMUSG000000020611</a> |
| 36. Itga11   | <a href="#">ENSMUSG000000032243</a> | 83. Enah    | <a href="#">ENSMUSG000000022995</a> |
| 37. Pdgfd    | <a href="#">ENSMUSG000000032006</a> | 84. Itgb8   | <a href="#">ENSMUSG000000025321</a> |
| 38. Diap1    | <a href="#">ENSMUSG000000024456</a> | 85. Mylk4   | <a href="#">ENSMUSG000000044951</a> |
| 39. Itga1    | <a href="#">ENSMUSG000000042284</a> | 86. Pak2    | <a href="#">ENSMUSG000000022781</a> |
| 40. Arhgef12 | <a href="#">ENSMUSG000000059495</a> | 87. Cdc42   | <a href="#">ENSMUSG000000006699</a> |
| 41. Dock1    | <a href="#">ENSMUSG000000058325</a> | 88. Iqgap2  | <a href="#">ENSMUSG000000021676</a> |
| 42. Egfr     | <a href="#">ENSMUSG000000020122</a> | 89. Cyfip2  | <a href="#">ENSMUSG000000020340</a> |
| 43. Pfn2     | <a href="#">ENSMUSG000000027805</a> | 90. Pip4k2a | <a href="#">ENSMUSG000000026737</a> |
| 44. Iqgap1   | <a href="#">ENSMUSG000000030536</a> | 91. Pak4    | <a href="#">ENSMUSG000000030602</a> |
| 45. Fgf13    | <a href="#">ENSMUSG000000031137</a> | 92. Limk2   | <a href="#">ENSMUSG000000020451</a> |
| 46. Kras     | <a href="#">ENSMUSG000000030265</a> | 93. Arpc5   | <a href="#">ENSMUSG000000008475</a> |
| 47. Pip5k1b  | <a href="#">ENSMUSG000000024867</a> |             |                                     |

**S3C.** Lists of genes involved in Regulation of actin cytoskeleton (04810) as predicted targets of the Group 4 miRNAs.

| Gene Name |          | Gene Ensembl id                     |  | Gene Name |         | Gene Ensembl id                     |  |
|-----------|----------|-------------------------------------|--|-----------|---------|-------------------------------------|--|
| 1.        | Apc      | <a href="#">ENSMUSG00000005871</a>  |  | 30.       | Sos1    | <a href="#">ENSMUSG000000024241</a> |  |
| 2.        | Fgf10    | <a href="#">ENSMUSG000000021732</a> |  | 31.       | Itgb2   | <a href="#">ENSMUSG000000000290</a> |  |
| 3.        | Pip5k1c  | <a href="#">ENSMUSG000000034902</a> |  | 32.       | Rras2   | <a href="#">ENSMUSG000000055723</a> |  |
| 4.        | Pip4k2b  | <a href="#">ENSMUSG000000018547</a> |  | 33.       | Apc2    | <a href="#">ENSMUSG000000020135</a> |  |
| 5.        | Ppp1r12a | <a href="#">ENSMUSG000000019907</a> |  | 34.       | Actn1   | <a href="#">ENSMUSG000000015143</a> |  |
| 6.        | Pik3r1   | <a href="#">ENSMUSG000000041417</a> |  | 35.       | Tiam1   | <a href="#">ENSMUSG000000002489</a> |  |
| 7.        | Bcar1    | <a href="#">ENSMUSG000000031955</a> |  | 36.       | Crk     | <a href="#">ENSMUSG000000017776</a> |  |
| 8.        | Slc9a1   | <a href="#">ENSMUSG000000028854</a> |  | 37.       | Diap2   | <a href="#">ENSMUSG000000034480</a> |  |
| 9.        | Pdgfrb   | <a href="#">ENSMUSG000000024620</a> |  | 38.       | Vcl     | <a href="#">ENSMUSG000000021823</a> |  |
| 10.       | Wasl     | <a href="#">ENSMUSG000000029684</a> |  | 39.       | Pip4k2c | <a href="#">ENSMUSG000000025417</a> |  |
| 11.       | Cfl1     | <a href="#">ENSMUSG000000056201</a> |  | 40.       | Ppp1cb  | <a href="#">ENSMUSG000000014956</a> |  |
| 12.       | Wasf2    | <a href="#">ENSMUSG000000028868</a> |  | 41.       | Myh9    | <a href="#">ENSMUSG000000022443</a> |  |
| 13.       | Ptk2     | <a href="#">ENSMUSG000000022607</a> |  | 42.       | Ssh2    | <a href="#">ENSMUSG000000037926</a> |  |
| 14.       | Ezr      | <a href="#">ENSMUSG000000052397</a> |  | 43.       | Araf    | <a href="#">ENSMUSG000000001127</a> |  |
| 15.       | Itgb3    | <a href="#">ENSMUSG000000020689</a> |  | 44.       | Fgf9    | <a href="#">ENSMUSG000000021974</a> |  |
| 16.       | Pak1     | <a href="#">ENSMUSG000000030774</a> |  | 45.       | Rac2    | <a href="#">ENSMUSG000000033220</a> |  |
| 17.       | Arhgef4  | <a href="#">ENSMUSG000000037509</a> |  | 46.       | Gna13   | <a href="#">ENSMUSG000000020611</a> |  |
| 18.       | Rhoa     | <a href="#">ENSMUSG000000007815</a> |  | 47.       | Itgb8   | <a href="#">ENSMUSG000000025321</a> |  |
| 19.       | Pfn1     | <a href="#">ENSMUSG000000018293</a> |  | 48.       | Pak2    | <a href="#">ENSMUSG000000022781</a> |  |
| 20.       | Src      | <a href="#">ENSMUSG000000027646</a> |  | 49.       | Fgf2    | <a href="#">ENSMUSG000000037225</a> |  |
| 21.       | Cfl2     | <a href="#">ENSMUSG000000062929</a> |  | 50.       | Cdc42   | <a href="#">ENSMUSG000000006699</a> |  |
| 22.       | Crkl     | <a href="#">ENSMUSG000000006134</a> |  | 51.       | Cyfp2   | <a href="#">ENSMUSG000000020340</a> |  |
| 23.       | Arhgef12 | <a href="#">ENSMUSG000000059495</a> |  | 52.       | Pip4k2a | <a href="#">ENSMUSG000000026737</a> |  |
| 24.       | Egfr     | <a href="#">ENSMUSG000000020122</a> |  | 53.       | Rras    | <a href="#">ENSMUSG000000038387</a> |  |
| 25.       | Kras     | <a href="#">ENSMUSG000000030265</a> |  | 54.       | Itgal   | <a href="#">ENSMUSG000000030830</a> |  |
| 26.       | Rdx      | <a href="#">ENSMUSG000000032050</a> |  | 55.       | Pak4    | <a href="#">ENSMUSG000000030602</a> |  |
| 27.       | Nckap1   | <a href="#">ENSMUSG000000027002</a> |  | 56.       | Limk2   | <a href="#">ENSMUSG000000020451</a> |  |
| 28.       | Nras     | <a href="#">ENSMUSG000000027852</a> |  | 57.       | Arpc5   | <a href="#">ENSMUSG000000008475</a> |  |
| 29.       | Rock2    | <a href="#">ENSMUSG000000020580</a> |  |           |         |                                     |  |

**S4A.** Lists of genes involved in ECM-receptor interaction (04512) as predicted targets of the Group 3 miRNAs.

|     | Gene Name | Gene Ensembl id                    |
|-----|-----------|------------------------------------|
| 1.  | Col3a1    | <a href="#">ENSMUSG00000026043</a> |
| 2.  | Itgb4     | <a href="#">ENSMUSG00000020758</a> |
| 3.  | Col6a3    | <a href="#">ENSMUSG00000048126</a> |
| 4.  | Itgb3     | <a href="#">ENSMUSG00000020689</a> |
| 5.  | Itgb7     | <a href="#">ENSMUSG00000001281</a> |
| 6.  | Thbs2     | <a href="#">ENSMUSG00000023885</a> |
| 7.  | Fn1       | <a href="#">ENSMUSG00000026193</a> |
| 8.  | Col5a2    | <a href="#">ENSMUSG00000026042</a> |
| 9.  | Sdc1      | <a href="#">ENSMUSG00000020592</a> |
| 10. | Hmmr      | <a href="#">ENSMUSG00000020330</a> |
| 11. | Col5a3    | <a href="#">ENSMUSG00000004098</a> |
| 12. | Lamc1     | <a href="#">ENSMUSG00000026478</a> |
| 13. | Col4a1    | <a href="#">ENSMUSG00000031502</a> |
| 14. | Tnc       | <a href="#">ENSMUSG00000028364</a> |
| 15. | Itgb1     | <a href="#">ENSMUSG00000025809</a> |
| 16. | Col11a1   | <a href="#">ENSMUSG00000027966</a> |
| 17. | Cd44      | <a href="#">ENSMUSG00000005087</a> |
| 18. | Col6a2    | <a href="#">ENSMUSG00000020241</a> |
| 19. | Lama5     | <a href="#">ENSMUSG00000015647</a> |
| 20. | Itgb8     | <a href="#">ENSMUSG00000025321</a> |
| 21. | Col4a2    | <a href="#">ENSMUSG00000031503</a> |
| 22. | Col6a1    | <a href="#">ENSMUSG00000001119</a> |
| 23. | Npnt      | <a href="#">ENSMUSG00000040998</a> |

S5A. Lists of genes involved in Focal adhesion (04510) as predicted targets of the Group 1 miRNAs.

| Gene Name |          | Gene Ensembl id                    | Gene Name |         | Gene Ensembl id                    |
|-----------|----------|------------------------------------|-----------|---------|------------------------------------|
| 1.        | Pxn      | <a href="#">ENSMUSG00000029528</a> | 28.       | Arhgap5 | <a href="#">ENSMUSG00000035133</a> |
| 2.        | Ppp1r12b | <a href="#">ENSMUSG00000073557</a> | 29.       | Rap1b   | <a href="#">ENSMUSG00000052681</a> |
| 3.        | Ppp1r12a | <a href="#">ENSMUSG00000019907</a> | 30.       | Bcl2    | <a href="#">ENSMUSG00000057329</a> |
| 4.        | Flt1     | <a href="#">ENSMUSG00000029648</a> | 31.       | Actn4   | <a href="#">ENSMUSG00000054808</a> |
| 5.        | Pik3r1   | <a href="#">ENSMUSG00000041417</a> | 32.       | Actn1   | <a href="#">ENSMUSG00000015143</a> |
| 6.        | Pik3r3   | <a href="#">ENSMUSG00000028698</a> | 33.       | Pik3cb  | <a href="#">ENSMUSG00000032462</a> |
| 7.        | Gsk3b    | <a href="#">ENSMUSG00000022812</a> | 34.       | Mylk    | <a href="#">ENSMUSG00000022836</a> |
| 8.        | Myl12b   | <a href="#">ENSMUSG00000034868</a> | 35.       | Ccnd2   | <a href="#">ENSMUSG00000000184</a> |
| 9.        | Pdgfrb   | <a href="#">ENSMUSG00000024620</a> | 36.       | Itgav   | <a href="#">ENSMUSG00000027087</a> |
| 10.       | Rap1a    | <a href="#">ENSMUSG00000068798</a> | 37.       | Crk     | <a href="#">ENSMUSG00000017776</a> |
| 11.       | Tnr      | <a href="#">ENSMUSG00000015829</a> | 38.       | Prkca   | <a href="#">ENSMUSG00000050965</a> |
| 12.       | Birc3    | <a href="#">ENSMUSG00000032000</a> | 39.       | Vcl     | <a href="#">ENSMUSG00000021823</a> |
| 13.       | Arhgap35 | <a href="#">ENSMUSG00000058230</a> | 40.       | Ppp1cb  | <a href="#">ENSMUSG00000014956</a> |
| 14.       | Igf1     | <a href="#">ENSMUSG00000020053</a> | 41.       | Lamc1   | <a href="#">ENSMUSG00000026478</a> |
| 15.       | Itgb3    | <a href="#">ENSMUSG00000020689</a> | 42.       | Fyn     | <a href="#">ENSMUSG00000019843</a> |
| 16.       | Itgb7    | <a href="#">ENSMUSG00000001281</a> | 43.       | Itgb1   | <a href="#">ENSMUSG00000025809</a> |
| 17.       | Col1a1   | <a href="#">ENSMUSG00000001506</a> | 44.       | Itga7   | <a href="#">ENSMUSG00000025348</a> |
| 18.       | Pak1     | <a href="#">ENSMUSG00000030774</a> | 45.       | Pten    | <a href="#">ENSMUSG00000013663</a> |
| 19.       | Shc1     | <a href="#">ENSMUSG00000042626</a> | 46.       | Pik3cd  | <a href="#">ENSMUSG00000039936</a> |
| 20.       | Crkl     | <a href="#">ENSMUSG00000006134</a> | 47.       | Itgb8   | <a href="#">ENSMUSG00000025321</a> |
| 21.       | Egfr     | <a href="#">ENSMUSG00000020122</a> | 48.       | Myl9    | <a href="#">ENSMUSG00000067818</a> |
| 22.       | Braf     | <a href="#">ENSMUSG00000002413</a> | 49.       | Pak2    | <a href="#">ENSMUSG00000022781</a> |
| 23.       | Mapk9    | <a href="#">ENSMUSG00000020366</a> | 50.       | Col4a2  | <a href="#">ENSMUSG00000031503</a> |
| 24.       | Parva    | <a href="#">ENSMUSG00000030770</a> | 51.       | Cdc42   | <a href="#">ENSMUSG00000006699</a> |
| 25.       | Rac1     | <a href="#">ENSMUSG00000001847</a> | 52.       | Cav2    | <a href="#">ENSMUSG00000000058</a> |
| 26.       | Rock2    | <a href="#">ENSMUSG00000020580</a> | 53.       | Mapk8   | <a href="#">ENSMUSG00000021936</a> |
| 27.       | Sos1     | <a href="#">ENSMUSG00000024241</a> |           |         |                                    |

**S5B.** Lists of genes involved in Focal adhesion (04510) as predicted targets of the Group 2 miRNAs.

| Gene Name |          | Gene Ensembl id                    | Gene Name |         | Gene Ensembl id                    |
|-----------|----------|------------------------------------|-----------|---------|------------------------------------|
| 1.        | Vav2     | <a href="#">ENSMUSG00000009621</a> | 46.       | Parva   | <a href="#">ENSMUSG00000030770</a> |
| 2.        | Sos2     | <a href="#">ENSMUSG00000034801</a> | 47.       | Ccnd1   | <a href="#">ENSMUSG00000070348</a> |
| 3.        | Lama4    | <a href="#">ENSMUSG00000019846</a> | 48.       | Rac1    | <a href="#">ENSMUSG00000001847</a> |
| 4.        | Pip5k1c  | <a href="#">ENSMUSG00000034902</a> | 49.       | Rock2   | <a href="#">ENSMUSG00000020580</a> |
| 5.        | Flt1     | <a href="#">ENSMUSG00000029648</a> | 50.       | Sos1    | <a href="#">ENSMUSG00000024241</a> |
| 6.        | Pik3r1   | <a href="#">ENSMUSG00000041417</a> | 51.       | Arhgap5 | <a href="#">ENSMUSG00000035133</a> |
| 7.        | Ibsp     | <a href="#">ENSMUSG00000029306</a> | 52.       | Rap1b   | <a href="#">ENSMUSG00000052681</a> |
| 8.        | Pdpk1    | <a href="#">ENSMUSG00000024122</a> | 53.       | Itga8   | <a href="#">ENSMUSG00000026768</a> |
| 9.        | Jun      | <a href="#">ENSMUSG00000052684</a> | 54.       | Bcl2    | <a href="#">ENSMUSG00000057329</a> |
| 10.       | Pik3r3   | <a href="#">ENSMUSG00000028698</a> | 55.       | Actn1   | <a href="#">ENSMUSG00000015143</a> |
| 11.       | Gsk3b    | <a href="#">ENSMUSG00000022812</a> | 56.       | Pik3cb  | <a href="#">ENSMUSG00000032462</a> |
| 12.       | Pdgfrb   | <a href="#">ENSMUSG00000024620</a> | 57.       | Col24a1 | <a href="#">ENSMUSG00000028197</a> |
| 13.       | Kdr      | <a href="#">ENSMUSG00000062960</a> | 58.       | Ccnd2   | <a href="#">ENSMUSG00000000184</a> |
| 14.       | Rap1a    | <a href="#">ENSMUSG00000068798</a> | 59.       | Itgav   | <a href="#">ENSMUSG00000027087</a> |
| 15.       | Col3a1   | <a href="#">ENSMUSG00000026043</a> | 60.       | Crk     | <a href="#">ENSMUSG00000017776</a> |
| 16.       | Spp1     | <a href="#">ENSMUSG00000029304</a> | 61.       | Prkca   | <a href="#">ENSMUSG00000050965</a> |
| 17.       | Vav3     | <a href="#">ENSMUSG00000033721</a> | 62.       | Col1a2  | <a href="#">ENSMUSG00000029661</a> |
| 18.       | Map2k1   | <a href="#">ENSMUSG00000004936</a> | 63.       | Vcl     | <a href="#">ENSMUSG00000021823</a> |
| 19.       | Itga6    | <a href="#">ENSMUSG00000027111</a> | 64.       | Ppp1cb  | <a href="#">ENSMUSG00000014956</a> |
| 20.       | Thbs1    | <a href="#">ENSMUSG00000040152</a> | 65.       | Actg1   | <a href="#">ENSMUSG00000062825</a> |
| 21.       | Rock1    | <a href="#">ENSMUSG00000024290</a> | 66.       | Elk1    | <a href="#">ENSMUSG00000009406</a> |
| 22.       | Birc3    | <a href="#">ENSMUSG00000032000</a> | 67.       | Lamc1   | <a href="#">ENSMUSG00000026478</a> |
| 23.       | Arhgap35 | <a href="#">ENSMUSG00000058230</a> | 68.       | Itga3   | <a href="#">ENSMUSG00000001507</a> |
| 24.       | Igf1     | <a href="#">ENSMUSG00000020053</a> | 69.       | Fyn     | <a href="#">ENSMUSG00000019843</a> |
| 25.       | Itgb3    | <a href="#">ENSMUSG00000020689</a> | 70.       | Tnc     | <a href="#">ENSMUSG00000028364</a> |
| 26.       | Itgb7    | <a href="#">ENSMUSG00000001281</a> | 71.       | Itgb1   | <a href="#">ENSMUSG00000025809</a> |
| 27.       | Grb2     | <a href="#">ENSMUSG00000059923</a> | 72.       | Col11a1 | <a href="#">ENSMUSG00000027966</a> |
| 28.       | Pak1     | <a href="#">ENSMUSG00000030774</a> | 73.       | Vtn     | <a href="#">ENSMUSG00000017344</a> |
| 29.       | Shc1     | <a href="#">ENSMUSG00000042626</a> | 74.       | Pten    | <a href="#">ENSMUSG00000013663</a> |
| 30.       | Col27a1  | <a href="#">ENSMUSG00000045672</a> | 75.       | Flnc    | <a href="#">ENSMUSG00000068699</a> |
| 31.       | Itga5    | <a href="#">ENSMUSG00000000555</a> | 76.       | Col6a2  | <a href="#">ENSMUSG00000020241</a> |
| 32.       | Src      | <a href="#">ENSMUSG00000027646</a> | 77.       | ErbB2   | <a href="#">ENSMUSG00000062312</a> |
| 33.       | Rasgrf1  | <a href="#">ENSMUSG00000032356</a> | 78.       | Itgb8   | <a href="#">ENSMUSG00000025321</a> |
| 34.       | Ppp1r12c | <a href="#">ENSMUSG00000019254</a> | 79.       | Mylk4   | <a href="#">ENSMUSG00000044951</a> |
| 35.       | Actb     | <a href="#">ENSMUSG00000029580</a> | 80.       | Pak2    | <a href="#">ENSMUSG00000022781</a> |
| 36.       | Itga11   | <a href="#">ENSMUSG00000032243</a> | 81.       | Met     | <a href="#">ENSMUSG00000009376</a> |
| 37.       | Pdgfd    | <a href="#">ENSMUSG00000032006</a> | 82.       | Col4a2  | <a href="#">ENSMUSG00000031503</a> |
| 38.       | Diap1    | <a href="#">ENSMUSG00000024456</a> | 83.       | Cdc42   | <a href="#">ENSMUSG00000006699</a> |
| 39.       | Vegfa    | <a href="#">ENSMUSG00000023951</a> | 84.       | Col5a1  | <a href="#">ENSMUSG00000026837</a> |
| 40.       | Itga1    | <a href="#">ENSMUSG00000042284</a> | 85.       | Shc4    | <a href="#">ENSMUSG00000035109</a> |
| 41.       | Dock1    | <a href="#">ENSMUSG00000058325</a> | 86.       | Tln1    | <a href="#">ENSMUSG00000028465</a> |
| 42.       | Egfr     | <a href="#">ENSMUSG00000020122</a> | 87.       | Cav2    | <a href="#">ENSMUSG00000000058</a> |
| 43.       | Thbs2    | <a href="#">ENSMUSG00000023885</a> | 88.       | Mapk8   | <a href="#">ENSMUSG00000021936</a> |
| 44.       | Braf     | <a href="#">ENSMUSG00000002413</a> | 89.       | Pak4    | <a href="#">ENSMUSG00000030602</a> |
| 45.       | Mapk9    | <a href="#">ENSMUSG00000020366</a> |           |         |                                    |

S5C. Lists of genes involved in Focal adhesion (04510) as predicted targets of the Group 3 miRNAs.

| Gene Name |          | Gene Ensembl id                    | Gene Name |         | Gene Ensembl id                    |
|-----------|----------|------------------------------------|-----------|---------|------------------------------------|
| 1.        | Sos2     | <a href="#">ENSMUSG00000034801</a> | 28.       | Col5a2  | <a href="#">ENSMUSG00000026042</a> |
| 2.        | Ppp1r12b | <a href="#">ENSMUSG00000073557</a> | 29.       | Pik3cb  | <a href="#">ENSMUSG00000032462</a> |
| 3.        | Pik3r1   | <a href="#">ENSMUSG00000041417</a> | 30.       | Col5a3  | <a href="#">ENSMUSG00000004098</a> |
| 4.        | Parvb    | <a href="#">ENSMUSG00000022438</a> | 31.       | Pdgfb   | <a href="#">ENSMUSG00000000489</a> |
| 5.        | Pdpk1    | <a href="#">ENSMUSG00000024122</a> | 32.       | Ccnd2   | <a href="#">ENSMUSG00000000184</a> |
| 6.        | Gsk3b    | <a href="#">ENSMUSG00000022812</a> | 33.       | Crk     | <a href="#">ENSMUSG00000017776</a> |
| 7.        | Pdgfrb   | <a href="#">ENSMUSG00000024620</a> | 34.       | Prkca   | <a href="#">ENSMUSG00000050965</a> |
| 8.        | Rap1a    | <a href="#">ENSMUSG00000068798</a> | 35.       | Ppp1cb  | <a href="#">ENSMUSG00000014956</a> |
| 9.        | Col3a1   | <a href="#">ENSMUSG00000026043</a> | 36.       | Elk1    | <a href="#">ENSMUSG00000009406</a> |
| 10.       | Flnb     | <a href="#">ENSMUSG00000025278</a> | 37.       | Lamc1   | <a href="#">ENSMUSG00000026478</a> |
| 11.       | Itgb4    | <a href="#">ENSMUSG00000020758</a> | 38.       | Col4a1  | <a href="#">ENSMUSG00000031502</a> |
| 12.       | Col6a3   | <a href="#">ENSMUSG00000048126</a> | 39.       | Fyn     | <a href="#">ENSMUSG00000019843</a> |
| 13.       | Rock1    | <a href="#">ENSMUSG00000024290</a> | 40.       | Tnc     | <a href="#">ENSMUSG00000028364</a> |
| 14.       | Birc3    | <a href="#">ENSMUSG00000032000</a> | 41.       | Itgb1   | <a href="#">ENSMUSG00000025809</a> |
| 15.       | Igf1     | <a href="#">ENSMUSG00000020053</a> | 42.       | Col11a1 | <a href="#">ENSMUSG00000027966</a> |
| 16.       | Itgb3    | <a href="#">ENSMUSG00000020689</a> | 43.       | Pten    | <a href="#">ENSMUSG00000013663</a> |
| 17.       | Itgb7    | <a href="#">ENSMUSG00000001281</a> | 44.       | Col6a2  | <a href="#">ENSMUSG00000020241</a> |
| 18.       | Hgf      | <a href="#">ENSMUSG00000028864</a> | 45.       | ErbB2   | <a href="#">ENSMUSG00000062312</a> |
| 19.       | Vegfa    | <a href="#">ENSMUSG00000023951</a> | 46.       | Lama5   | <a href="#">ENSMUSG00000015647</a> |
| 20.       | Egfr     | <a href="#">ENSMUSG00000020122</a> | 47.       | Itgb8   | <a href="#">ENSMUSG00000025321</a> |
| 21.       | Thbs2    | <a href="#">ENSMUSG00000023885</a> | 48.       | Col4a2  | <a href="#">ENSMUSG00000031503</a> |
| 22.       | Braf     | <a href="#">ENSMUSG00000002413</a> | 49.       | Cdc42   | <a href="#">ENSMUSG00000006699</a> |
| 23.       | Fn1      | <a href="#">ENSMUSG00000026193</a> | 50.       | Shc4    | <a href="#">ENSMUSG00000035109</a> |
| 24.       | Rock2    | <a href="#">ENSMUSG00000020580</a> | 51.       | Col6a1  | <a href="#">ENSMUSG00000001119</a> |
| 25.       | Sos1     | <a href="#">ENSMUSG00000024241</a> | 52.       | Cav2    | <a href="#">ENSMUSG00000000058</a> |
| 26.       | Arhgap5  | <a href="#">ENSMUSG00000035133</a> | 53.       | Mapk8   | <a href="#">ENSMUSG00000021936</a> |
| 27.       | Rap1b    | <a href="#">ENSMUSG00000052681</a> |           |         |                                    |

**S5D.** Lists of genes involved in Focal adhesion (04510) as predicted targets of the Group 4 miRNAs.

| Gene Name |          | Gene Ensembl id                    | Gene Name |         | Gene Ensembl id                    |
|-----------|----------|------------------------------------|-----------|---------|------------------------------------|
| 1.        | Pip5k1c  | <a href="#">ENSMUSG00000034902</a> | 27.       | Igf1r   | <a href="#">ENSMUSG00000005533</a> |
| 2.        | Ppp1r12a | <a href="#">ENSMUSG00000019907</a> | 28.       | Rock2   | <a href="#">ENSMUSG00000020580</a> |
| 3.        | Flt1     | <a href="#">ENSMUSG00000029648</a> | 29.       | Sos1    | <a href="#">ENSMUSG00000024241</a> |
| 4.        | Pik3r1   | <a href="#">ENSMUSG00000041417</a> | 30.       | Arhgap5 | <a href="#">ENSMUSG00000035133</a> |
| 5.        | Pdpk1    | <a href="#">ENSMUSG00000024122</a> | 31.       | Bcl2    | <a href="#">ENSMUSG00000057329</a> |
| 6.        | Bcar1    | <a href="#">ENSMUSG00000031955</a> | 32.       | Actn1   | <a href="#">ENSMUSG00000015143</a> |
| 7.        | Pdgfrb   | <a href="#">ENSMUSG00000024620</a> | 33.       | Ccnd2   | <a href="#">ENSMUSG00000000184</a> |
| 8.        | Kdr      | <a href="#">ENSMUSG00000062960</a> | 34.       | Crk     | <a href="#">ENSMUSG00000017776</a> |
| 9.        | Spp1     | <a href="#">ENSMUSG00000029304</a> | 35.       | Prkca   | <a href="#">ENSMUSG00000050965</a> |
| 10.       | Tnr      | <a href="#">ENSMUSG00000015829</a> | 36.       | Col1a2  | <a href="#">ENSMUSG00000029661</a> |
| 11.       | Ptk2     | <a href="#">ENSMUSG00000022607</a> | 37.       | Vcl     | <a href="#">ENSMUSG00000021823</a> |
| 12.       | Thbs1    | <a href="#">ENSMUSG00000040152</a> | 38.       | Ppp1cb  | <a href="#">ENSMUSG00000014956</a> |
| 13.       | Reln     | <a href="#">ENSMUSG00000042453</a> | 39.       | Lama1   | <a href="#">ENSMUSG00000032796</a> |
| 14.       | Birc3    | <a href="#">ENSMUSG00000032000</a> | 40.       | Col4a1  | <a href="#">ENSMUSG00000031502</a> |
| 15.       | Igf1     | <a href="#">ENSMUSG00000020053</a> | 41.       | Fyn     | <a href="#">ENSMUSG00000019843</a> |
| 16.       | Itgb3    | <a href="#">ENSMUSG00000020689</a> | 42.       | Rac2    | <a href="#">ENSMUSG00000033220</a> |
| 17.       | Col1a1   | <a href="#">ENSMUSG00000001506</a> | 43.       | Pten    | <a href="#">ENSMUSG00000013663</a> |
| 18.       | Pak1     | <a href="#">ENSMUSG00000030774</a> | 44.       | Itgb8   | <a href="#">ENSMUSG00000025321</a> |
| 19.       | Rhoa     | <a href="#">ENSMUSG00000007815</a> | 45.       | Pak2    | <a href="#">ENSMUSG00000022781</a> |
| 20.       | Src      | <a href="#">ENSMUSG00000027646</a> | 46.       | Met     | <a href="#">ENSMUSG00000009376</a> |
| 21.       | Rasgrf1  | <a href="#">ENSMUSG00000032356</a> | 47.       | Lamb1   | <a href="#">ENSMUSG00000002900</a> |
| 22.       | Vegfa    | <a href="#">ENSMUSG00000023951</a> | 48.       | Col4a2  | <a href="#">ENSMUSG00000031503</a> |
| 23.       | Crkl     | <a href="#">ENSMUSG00000006134</a> | 49.       | Cdc42   | <a href="#">ENSMUSG00000006699</a> |
| 24.       | Egfr     | <a href="#">ENSMUSG00000020122</a> | 50.       | Shc4    | <a href="#">ENSMUSG00000035109</a> |
| 25.       | Mapk9    | <a href="#">ENSMUSG00000020366</a> | 51.       | Tln1    | <a href="#">ENSMUSG00000028465</a> |
| 26.       | Ccnd1    | <a href="#">ENSMUSG00000070348</a> | 52.       | Pak4    | <a href="#">ENSMUSG00000030602</a> |

**S6A.** Lists of genes involved in Osteoclast differentiation (04380) as predicted targets of the Group 1 miRNA.

|     | Gene Name | Gene Ensembl id                    |
|-----|-----------|------------------------------------|
| 1.  | Mapk14    | <a href="#">ENSMUSG00000053436</a> |
| 2.  | Pik3r1    | <a href="#">ENSMUSG00000041417</a> |
| 3.  | Pik3r3    | <a href="#">ENSMUSG00000028698</a> |
| 4.  | Cybb      | <a href="#">ENSMUSG00000015340</a> |
| 5.  | Stat2     | <a href="#">ENSMUSG00000040033</a> |
| 6.  | Tnfrsf1a  | <a href="#">ENSMUSG00000030341</a> |
| 7.  | Socs3     | <a href="#">ENSMUSG00000053113</a> |
| 8.  | Ifngr1    | <a href="#">ENSMUSG00000020009</a> |
| 9.  | Fhl2      | <a href="#">ENSMUSG00000008136</a> |
| 10. | Map2k6    | <a href="#">ENSMUSG00000020623</a> |
| 11. | Itgb3     | <a href="#">ENSMUSG00000020689</a> |
| 12. | Creb1     | <a href="#">ENSMUSG00000025958</a> |
| 13. | Il1r1     | <a href="#">ENSMUSG00000026072</a> |
| 14. | Junb      | <a href="#">ENSMUSG00000052837</a> |
| 15. | Sqstm1    | <a href="#">ENSMUSG00000015837</a> |
| 16. | Ifngr2    | <a href="#">ENSMUSG00000022965</a> |
| 17. | Lcp2      | <a href="#">ENSMUSG00000002699</a> |
| 18. | Ppp3cb    | <a href="#">ENSMUSG00000021816</a> |
| 19. | Mapk9     | <a href="#">ENSMUSG00000020366</a> |
| 20. | Tgfb2     | <a href="#">ENSMUSG00000032440</a> |
| 21. | Rac1      | <a href="#">ENSMUSG00000001847</a> |
| 22. | Camk4     | <a href="#">ENSMUSG00000038128</a> |
| 23. | Jak1      | <a href="#">ENSMUSG00000028530</a> |
| 24. | Mitf      | <a href="#">ENSMUSG00000035158</a> |
| 25. | Pik3cb    | <a href="#">ENSMUSG00000032462</a> |
| 26. | Tnf       | <a href="#">ENSMUSG00000024401</a> |
| 27. | Socs1     | <a href="#">ENSMUSG00000038037</a> |
| 28. | Fosl2     | <a href="#">ENSMUSG00000029135</a> |
| 29. | Fyn       | <a href="#">ENSMUSG00000019843</a> |
| 30. | Ppp3r1    | <a href="#">ENSMUSG00000033953</a> |
| 31. | Ppp3ca    | <a href="#">ENSMUSG00000028161</a> |
| 32. | Calcr     | <a href="#">ENSMUSG00000023964</a> |
| 33. | Tnfrsf11  | <a href="#">ENSMUSG00000022015</a> |
| 34. | Pik3cd    | <a href="#">ENSMUSG00000039936</a> |
| 35. | Tab2      | <a href="#">ENSMUSG00000015755</a> |
| 36. | Mapk8     | <a href="#">ENSMUSG00000021936</a> |

**S6B.** Lists of genes involved in Osteoclast differentiation (04380) as predicted targets of the Group 2 miRNA.

| Gene Name |               | Gene Ensembl id                     | Gene Name |                | Gene Ensembl id                    |
|-----------|---------------|-------------------------------------|-----------|----------------|------------------------------------|
| 1.        | <b>Tgfb2</b>  | <a href="#">ENSMUSG00000039239</a>  | 26.       | <b>Tgfb2</b>   | <a href="#">ENSMUSG00000032440</a> |
| 2.        | <b>Mapk14</b> | <a href="#">ENSMUSG00000053436</a>  | 27.       | <b>Rac1</b>    | <a href="#">ENSMUSG00000001847</a> |
| 3.        | <b>Irf9</b>   | <a href="#">ENSMUSG00000002325</a>  | 28.       | <b>Camk4</b>   | <a href="#">ENSMUSG00000038128</a> |
| 4.        | <b>Pik3r1</b> | <a href="#">ENSMUSG000000041417</a> | 29.       | <b>Jak1</b>    | <a href="#">ENSMUSG00000028530</a> |
| 5.        | <b>Jun</b>    | <a href="#">ENSMUSG00000052684</a>  | 30.       | <b>Map2k7</b>  | <a href="#">ENSMUSG00000002948</a> |
| 6.        | <b>Pik3r3</b> | <a href="#">ENSMUSG00000028698</a>  | 31.       | <b>Ifng</b>    | <a href="#">ENSMUSG00000055170</a> |
| 7.        | <b>Stat2</b>  | <a href="#">ENSMUSG00000040033</a>  | 32.       | <b>Mitf</b>    | <a href="#">ENSMUSG00000035158</a> |
| 8.        | <b>Fosl1</b>  | <a href="#">ENSMUSG00000024912</a>  | 33.       | <b>Pik3cb</b>  | <a href="#">ENSMUSG00000032462</a> |
| 9.        | <b>Stat1</b>  | <a href="#">ENSMUSG00000026104</a>  | 34.       | <b>Tnf</b>     | <a href="#">ENSMUSG00000024401</a> |
| 10.       | <b>Socs3</b>  | <a href="#">ENSMUSG00000053113</a>  | 35.       | <b>Nfkb1</b>   | <a href="#">ENSMUSG00000028163</a> |
| 11.       | <b>Ifngr1</b> | <a href="#">ENSMUSG00000020009</a>  | 36.       | <b>Socs1</b>   | <a href="#">ENSMUSG00000038037</a> |
| 12.       | <b>Map2k1</b> | <a href="#">ENSMUSG00000004936</a>  | 37.       | <b>Fosl2</b>   | <a href="#">ENSMUSG00000029135</a> |
| 13.       | <b>Fos</b>    | <a href="#">ENSMUSG00000021250</a>  | 38.       | <b>Fyn</b>     | <a href="#">ENSMUSG00000019843</a> |
| 14.       | <b>Map2k6</b> | <a href="#">ENSMUSG00000020623</a>  | 39.       | <b>Ppp3r1</b>  | <a href="#">ENSMUSG00000033953</a> |
| 15.       | <b>Ncf1</b>   | <a href="#">ENSMUSG00000015950</a>  | 40.       | <b>Traf6</b>   | <a href="#">ENSMUSG00000027164</a> |
| 16.       | <b>Itgb3</b>  | <a href="#">ENSMUSG00000020689</a>  | 41.       | <b>Csf1</b>    | <a href="#">ENSMUSG00000014599</a> |
| 17.       | <b>Creb1</b>  | <a href="#">ENSMUSG00000025958</a>  | 42.       | <b>Calcr</b>   | <a href="#">ENSMUSG00000023964</a> |
| 18.       | <b>Junb</b>   | <a href="#">ENSMUSG00000052837</a>  | 43.       | <b>Tnfsf11</b> | <a href="#">ENSMUSG00000022015</a> |
| 19.       | <b>Grb2</b>   | <a href="#">ENSMUSG00000059923</a>  | 44.       | <b>Cyld</b>    | <a href="#">ENSMUSG00000036712</a> |
| 20.       | <b>Sqstm1</b> | <a href="#">ENSMUSG00000015837</a>  | 45.       | <b>Mapk11</b>  | <a href="#">ENSMUSG00000053137</a> |
| 21.       | <b>Ifngr2</b> | <a href="#">ENSMUSG00000022965</a>  | 46.       | <b>Sirpa</b>   | <a href="#">ENSMUSG00000037902</a> |
| 22.       | <b>Lcp2</b>   | <a href="#">ENSMUSG00000002699</a>  | 47.       | <b>Map3k7</b>  | <a href="#">ENSMUSG00000028284</a> |
| 23.       | <b>Tgfb2</b>  | <a href="#">ENSMUSG00000007613</a>  | 48.       | <b>Nfatc2</b>  | <a href="#">ENSMUSG00000027544</a> |
| 24.       | <b>Ifnar2</b> | <a href="#">ENSMUSG00000022971</a>  | 49.       | <b>Tab2</b>    | <a href="#">ENSMUSG00000015755</a> |
| 25.       | <b>Mapk9</b>  | <a href="#">ENSMUSG00000020366</a>  | 50.       | <b>Mapk8</b>   | <a href="#">ENSMUSG00000021936</a> |

Figure S2. Western blot with two independent biological samples (1° and 2° experiments), detected with NFATc1, ERK1/2, p-ERK1/2 and  $\beta$ -actin antibodies. Proteins were visualized using an Odyssey Infrared Imaging System (LI-COR Lincoln) according to the manufacturer's instructions. Fluorescence quantification of proteins was performed with the application software, version 3.0 (LI-COR, Biosciences) and values were shown as Integrated Intensity.

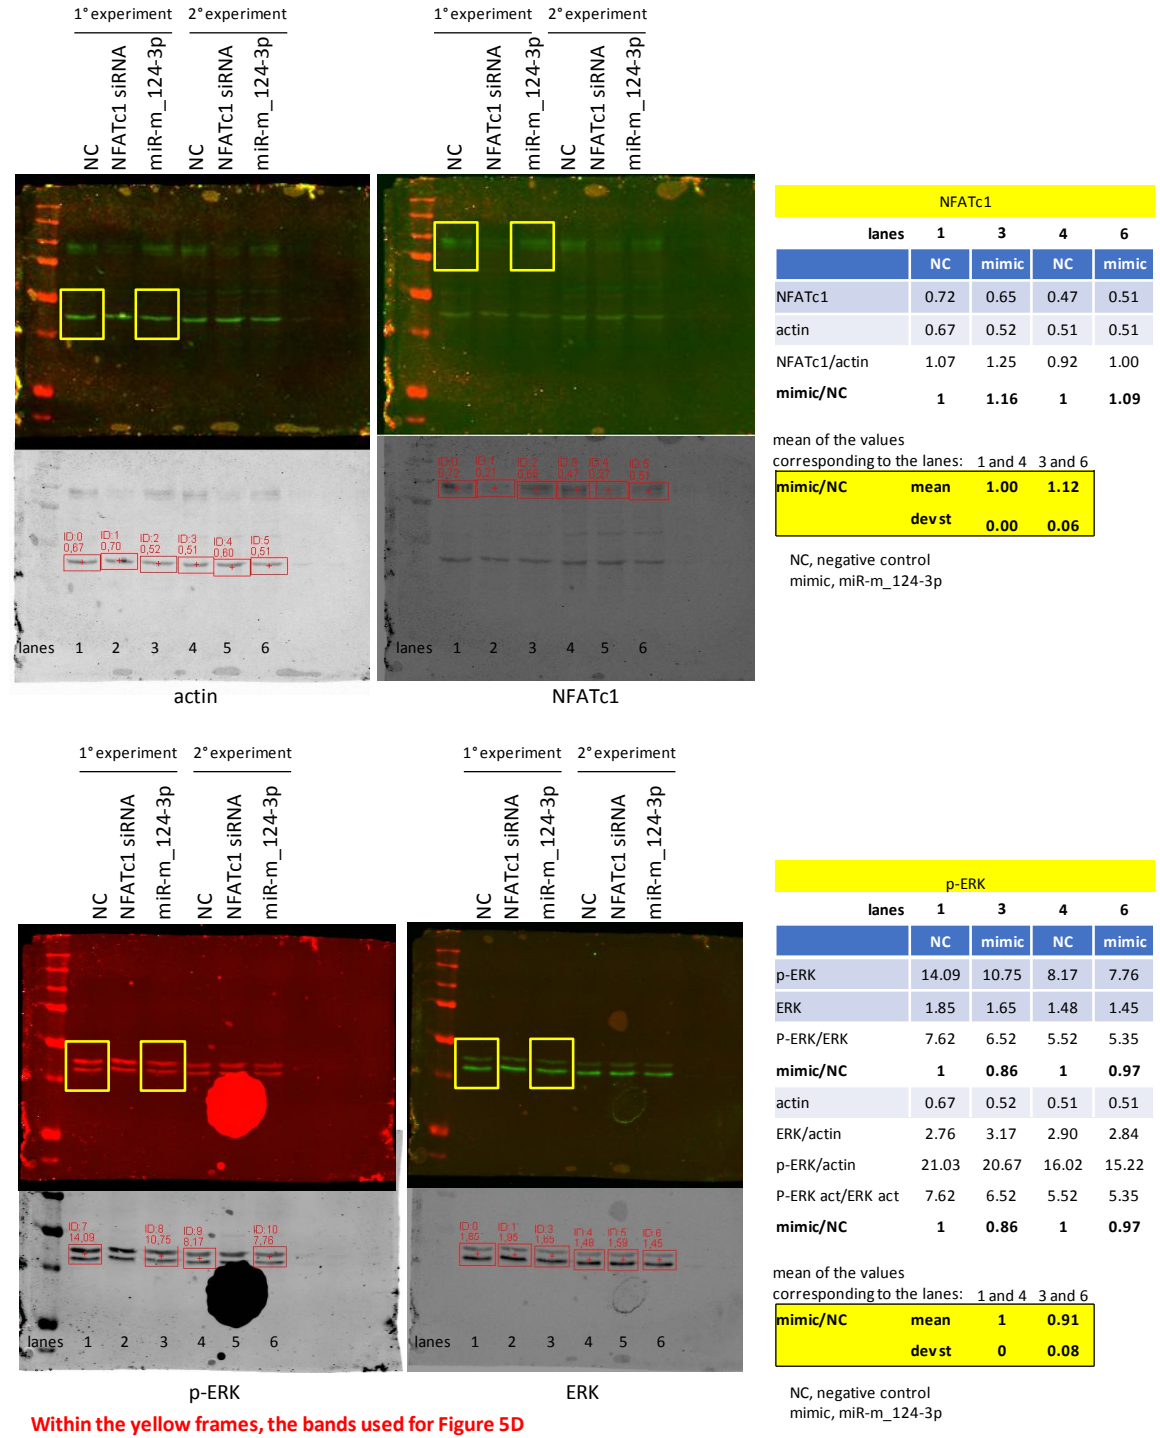

Within the yellow frames, the bands used for Figure 5D
